1 *Title*

2 **Copepod functional traits and groups show contrasting biogeographies in the global**  
3 **ocean**

4

5 *Running title*

6 Global marine copepod traits biogeography

7

8 *Authors*

9 Fabio Benedetti<sup>1\*</sup> (0000-0002-7554-3646)

10 Jonas Wydler<sup>1</sup>

11 Meike Vogt<sup>1</sup> (0000-0002-0608-1935)

12

13 <sup>1</sup>Environmental Physics, Institute of Biogeochemistry and Pollutant Dynamics, ETH Zürich, 8092  
14 Zürich, Switzerland.

15 \*Corresponding author: [fabio.benedetti@usys.ethz.ch](mailto:fabio.benedetti@usys.ethz.ch)

16

17 *Acknowledgements*

18 We thank all contributors involved in the plankton species field sampling and identification  
19 throughout the world and we acknowledge the efforts made to deposit the data on publicly  
20 available online archives. This project has received funding from the European Union's  
21 Horizon 2020 research and innovation program under grant agreement No. 862923. This  
22 output reflects only the author's view and the European Union cannot be held responsible for  
23 any use that may be made of the information contained therein. We thank Luke Gregor for  
24 editing the language of an early version of the manuscript.

25

26 *Conflict of interest*

27 The authors declare no conflict of interests.

28

29 *Abstract*

30 **Aim:** To define global zooplankton functional groups (FGs) and to estimate their  
31 environmental niche and habitat distribution. We model the spatial patterns of copepod FGs  
32 habitat and identify regions sharing similar functional trait expression at the community level.

33 **Taxon:** Marine planktonic Neocopepoda.

34 **Location:** Global ocean.

35 **Methods:** Factor analysis on mixed data and hierarchical clustering were used to identify  
36 copepod FGs based on five species-level functional traits. An ensemble of species distribution  
37 models was used to estimate the environmental niches of the modelled species, project the  
38 mean annual habitat suitability of the FGs, and to estimate the community weighted mean  
39 values of the traits studied. Ocean regions were defined based on their community-level mean  
40 trait expression using a principal component analysis and hierarchical clustering.

41 **Results:** Eleven global copepod FGs were identified. They displayed contrasting latitudinal  
42 patterns in mean annual habitat suitability that could be explained by differences in  
43 environmental niche preferences: two FGs were associated with polar conditions, one  
44 followed the global temperature gradient, five were associated with tropical oligotrophic  
45 gyres, and the remaining three with boundary currents and counter currents. Four main  
46 regions of varying community weighted mean trait values emerged: the Southern Ocean, the  
47 northern and southern high latitudes, the tropical gyres, and the boundary currents and  
48 upwelling systems.

49 **Conclusions:** We build on an exhaustive species trait dataset to put forward novel FGs that  
50 will improve the representation of zooplankton in global marine ecosystem models. Our  
51 results contribute to our understanding of the spatial patterns and drivers of marine plankton  
52 trait biogeography and will serve as a basis for studying the links between zooplankton  
53 biodiversity and ecosystem functioning and how they might evolve in the context of climate  
54 change.

55

56 *Keywords*

57 Planktonic copepods, Functional groups, Trait-based approach, Species Distribution  
58 Modelling, Global Ocean, Community weighted mean trait

59

## 60 **1. Introduction**

61 Copepods are crustaceans that dominate the biomass of the mesozooplankton size class (0.2-  
62 2.0 mm) and rank amongst the most abundant animals in the oceans (Turner, 2004; Kiørboe,  
63 2011a). They are morphologically and functionally diverse and are adapted to almost all  
64 marine ecosystems (Kiørboe, 2011a; Bron et al., 2011). Copepods play a pivotal role in the  
65 food web, both as microplankton grazers and prey for small pelagic fishes and other larger  
66 animals (Beaugrand, Edwards, & Legendre, 2010; Steinberg & Landry, 2017). Copepods play  
67 a critical role in the marine biological carbon pump, the fixation of inorganic carbon to  
68 organic matter by photosynthesis and consequent sequestration away from the surface into the  
69 deep ocean. Planktonic copepods export carbon from the euphotic layer to the deep ocean in  
70 several ways, such as the grazing of phytoplankton cells in the sunlit layers, followed by the  
71 excretion of relatively fast-sinking fecal pellets, or by extensive vertical migration (Turner,  
72 2015; Steinberg & Landry, 2017).

73 The relative contribution of planktonic copepods to the above-mentioned processes is  
74 mediated by their diversity and trait expression (Barton et al., 2013). For instance, larger  
75 copepods perform stronger diel vertical migration (Ohman & Romagnan, 2016) and produce  
76 larger fecal pellets that sink faster and thus increase the proportion of particulate organic  
77 carbon sinking to depth (Stamieszkin et al., 2015; Brun et al., 2019). The dominance of  
78 certain copepod feeding modes (i.e., the mechanism through which prey is captured) impacts  
79 food-web dynamics as feeding modes affect copepod grazing and mortality rates (Kenitz,  
80 Visser, Mariani, & Andersen, 2017; van Someren Gréve, Almeda, & Kiørboe, 2017). Yet,  
81 mechanistic ecosystem models usually represent zooplankton only through a couple of size  
82 classes (Le Quéré et al., 2005), which greatly oversimplifies the contribution of species  
83 diversity and functional traits to the functioning of ecosystems and biogeochemical cycles  
84 (Flynn et al., 2015). Multiple modelling studies show that the number of zooplankton  
85 functional groups and their grazing characteristics exerts an important control on the biomass  
86 and diversity of other trophic groups, with consequences for global biogeochemical cycles in  
87 these models (Prowse et al., 2012; Sailley et al., 2013; Vallina et al., 2014; Le Quéré et al.,  
88 2016). Ecosystem models, however, rely strongly on parameterisations of specific traits  
89 governing biological processes and food-web interactions (e.g. grazing rates or food  
90 preferences) based on scarce information, as the empirical evidence included in current  
91 models is often sourced from limited laboratory or field data from a narrow range of  
92 culturable species (Barton et al., 2013). Consequently, investigating the potential links

93 between copepod trait distribution and ecosystem functioning contributes to improving  
94 current ecosystem models (Stocker, 2014).

95 To better understand the role of planktonic copepods in marine systems, plankton ecologists  
96 are increasingly adopting trait-based approaches (Litchman, Ohman, & Kiørboe, 2013;  
97 Hébert, Beisner, & Maranger, 2017). Functional traits are species- or organism-level  
98 characteristics (morphological, behavioral, physiological, or related to life history) that affect  
99 their fitness and contribute to ecosystem functioning (Violle et al., 2007). According to  
100 Litchman et al. (2013), functional traits can be classified by the main functions they  
101 contribute to, namely, survival, feeding, growth, and reproduction. Organisms often cannot  
102 maximize all four ecological functions at the same time since there are trade-offs between  
103 these functions. For example, copepods that rely on passive feeding (i.e., copepods that  
104 remain immobile and only move to capture prey) show 8.5 times lower mortality rates than  
105 copepods that rely on active feeding (van Someren Gréve, Almeda, & Kiørboe, 2017). Yet,  
106 adult male copepods often need to move actively to find a mate for reproduction, which  
107 undermines the benefits of their feeding mode (Kiørboe, 2011b; Litchman et al., 2013).

108 Copepod functional traits can be investigated by grouping species into functional groups  
109 (FGs) according to similarities in functional trait combinations (Benedetti, Gasparini, &  
110 Ayata, 2016). Categorizing species according to their similarity in functional traits rather than  
111 their taxonomic classification allows one to summarize highly diverse groups, and/or  
112 communities, into more parsimonious categories defined by distinct ecological functions  
113 (Barnett, Finlay, & Beisner, 2007; Benedetti, Vogt, Righetti, Guilhaumon, & Ayata, 2018). At  
114 the regional scale, Pomerleau et al. (2015) showed that 42 zooplankton species from the North  
115 East Pacific Ocean could be clustered into five groups based on their body length, feeding and  
116 reproduction mode, and trophic group. Based on a similar set of traits, Benedetti, Vogt, et al.  
117 (2018) grouped 106 marine copepod species that dominate Mediterranean communities into  
118 seven FGs. They found that carnivorous species were associated with tropical oligotrophic  
119 conditions, whereas current-feeding herbivores were associated with more productive and  
120 seasonally varying conditions. Such groupings can improve the representation of zooplankton  
121 in an ecosystem model since FGs increase the representation of ecological function without  
122 adding taxonomic diversity and complexity. However, studies based on a regional pool of  
123 species might underestimate the real range of functions ensured by zooplankton in the global  
124 ocean, warranting the need for a study based on a global species pool.

125

126 The functional composition of observed plankton communities can be investigated through  
127 community weighted mean (CWM) values of traits (Ricotta, 2005; Pomerleau, Sastri, &  
128 Beisner, 2015; Brun et al., 2016). This is done by calculating the proportion of species in a  
129 community that exhibits a particular functional trait value by accounting for their relative  
130 contribution to community composition or abundance. Thereby, CWM values of functional  
131 traits help to identify the relationships between the emerging expression of functional traits on  
132 a community-level, the environmental conditions associated to the spatial patterns of trait  
133 expression (i.e., their biogeographical patterns), and the potential trade-offs underlying trait  
134 expression. Like for FGs, empirical CWM trait values of marine zooplankton have been  
135 explored on local or regional levels for the northern hemisphere mostly (Pomerleau et al.,  
136 2015; Pecuchet et al., 2018). They evidenced a negative impact of warming and seasonality  
137 on community-level body length and offspring size. The first truly global study by Brun et al.  
138 (2016) also found larger body sizes, higher proportions of myelinated species, and relatively  
139 smaller offspring size in latitudes  $>50^\circ$ , because of gradients in temperature and seasonality in  
140 phytoplankton production. To our knowledge, other qualitative traits, such as trophic groups  
141 or spawning mode, have not been investigated through the CWM trait approach (McGinty et  
142 al., 2018; Benedetti, Vogt et al., 2018). Therefore, their global spatial distribution remains  
143 poorly documented and a more complete understanding of trade-offs between the expression  
144 of these diverse traits is still needed to better characterize and map ecosystem functions  
145 worldwide. If geo-referenced trait information, such as patterns of CWM values, are clustered  
146 in space and time, they can be used to define ocean regions sharing common ecological  
147 characteristics (Longhurst, 2010; Reygondeau et al., 2017; Hofmann Elizondo et al., 2021).  
148 Such regionalization schemes have never been applied on plankton communities' functional  
149 trait expressions on a global scale, although this could be more informative of large-scale  
150 marine food web and ecosystem dynamics than previous regionalization schemes based on  
151 environmental parameters alone.

152 In this study, we address the following questions: (i) What are the global zooplankton FGs  
153 emerging from the/a clustering of the most frequently sampled copepod species according to  
154 their functional traits (Benedetti et al., 2016)? (ii) Which parameters structure FGs most  
155 strongly in functional trait space and environmental niche space (Benedetti, Vogt, et al.,  
156 2018)? (iii) What are the habitat distribution patterns of these FGs and their community-level  
157 trait expression (estimated through CWM trait values), and which regions of the global ocean  
158 share similar trait expression? To do so, a new functional trait synthesis was carried out for a  
159 global pool of  $>380$  frequently observed copepod species, and five traits (body size, trophic

160 group, feeding mode, myelination, and spawning mode) were used to identify novel FGs  
161 based on species' traits combinations. Occurrence-based species distribution models (SDMs)  
162 were used to investigate the differences in the environmental niches and monthly habitat  
163 distribution modelled for the new copepod FGs. Mean annual CWM trait values were derived  
164 from the monthly SDMs-based habitat distribution maps, and hierarchical clustering was used  
165 to identify regions that share similar community-level trait expression.

166

## 167 **2. Materials and Methods**

### 168 2.1. Species occurrence data

169 We used the zooplankton occurrences dataset (geo-localised and dated presences) of  
170 Benedetti et al. (2021), which has been gathered to model global zooplankton species  
171 biogeography, diversity and community composition. The dataset combines 165'716  
172 occurrences binned into the 1° x 1° grid of the World Ocean Atlas (WOA; Boyer et al., 2013)  
173 for 385 copepod species. The occurrences were initially retrieved from the Ocean  
174 Biodiversity Information System (OBIS; <https://www.obis.org>), the Global Biodiversity  
175 Information Facility (GBIF; <https://www.gbif.org>), as well as complementary datasets (see  
176 Benedetti et al., 2021 for an exhaustive description and for the curation of species names).  
177 The occurrences corresponding to benthic and parasitic taxa and those that were not fit to  
178 model the habitat of copepod species in the surface open ocean were discarded as follows:  
179 occurrences with missing spatial coordinates, sampling dates, sampling depth, or taxonomic  
180 identification at species-level were removed. Furthermore, occurrences from drilling holes,  
181 freshwater (sea surface salinity < 20 according to the WOA, grid cells within 25 km of the  
182 nearest shoreline, or with a sampling depth >500 m were also discarded.

183 The copepod occurrence data displayed sampling effort biases (Appendix S1) that could  
184 inflate metrics of empirical models' performance or over-represent portions of the  
185 environmental space and thus hinder model predictability and interpretation (Veloz, 2009;  
186 Hijmans, 2012). We addressed these potential sampling biases by further thinning the species-  
187 level occurrence data (Aiello-Lammens, Boria, Radosavljevic, Vilela, & Anderson, 2015).  
188 For each month and each species separately, the occurrences were thinned by applying a  
189 randomization algorithm (30 randomizations per species dataset) that returned a 'thinned'  
190 dataset where monthly species occurrences were at least 500 km apart (Aiello-Lammens,  
191 Boria, Radosavljevic, Vilela, & Anderson, 2015). Only those species displaying at least 50  
192 occurrences (n = 385) were retained and constituted the final list of species for which  
193 functional traits data were searched for in the literature.

194

## 195 2.2. Species functional trait data

196 The five following species-level functional traits were included in our analyses, as detailed  
197 below. These traits were chosen based on data availability from previous traits compilations  
198 and extended literature survey (see Appendices S2 and S3):

199 Body size (quantitative continuous): mean maximum adult female body size (i.e. length of the  
200 cephalothorax) in mm. Body size is considered a master functional trait as it impacts all life  
201 functions and scales most physiological rates (Kiørboe & Hirst, 2014; Hébert, Beisner, &  
202 Maranger, 2017) and influences predator-prey interactions (Hansen, Bjornsen, & Hansen,  
203 1994).

204 Trophic group (categorical): most marine planktonic copepods are omnivorous, yet they can  
205 be grouped according to their preference in food sources (Kiørboe, 2011a; Pomerleau et al.,  
206 2015; Benedetti et al., 2016). Here, the following five groups were defined: Omnivore-  
207 Herbivore, Omnivore-Carnivore, Omnivore-Detritivore, strict Carnivore, and Omnivore. The  
208 trophic group describes the primary food source of a species and therefore its role in food-  
209 web dynamics.

210 Feeding mode (categorical): copepods have developed various strategies to detect and capture  
211 food items. The present feeding modes followed the definitions of Kiørboe (2011a): ambush-  
212 feeding, current-feeding, cruise-feeding, particle-feeding, current-cruise feeding, and current-  
213 ambush feeding (the last two referred to those mixed-feeding species that perform both  
214 strategies; Kiørboe, 2011a; Litchman et al., 2013). Ambush-feeding copepods lurk stationarily  
215 in the water column and detect the vibration generated by motile preys thanks to specialized  
216 appendages (i.e., hydromechanical perception) and capture prey through quick jumps.  
217 Copepods perform active ambush-feeding according to Kiørboe (2011a), which is considered  
218 a more passive feeding mode than cruise-feeding and current-feeding (Brun et al., 2017).  
219 Current-feeding describes the use of a scanning current that can detect and capture food items.  
220 This strategy is believed to favor a more efficient capture of many immobile preys like  
221 phytoplankton cells compared to ambush-feeding (Kiørboe, 2011a). Lastly, cruise-feeders  
222 correspond to copepods that swim actively through the water column in search of their prey.

223 Myelination (binary): myelinated copepod species have a lipid-rich myelin sheath around  
224 their nerves that increases the speed of nervous signals transmission and therefore enables  
225 faster attack or evasive reactions (Lenz, 2012). Myelin sheaths play a key role in modulating  
226 mortality and feeding rates and improving energy savings under low food conditions.

227 Spawning mode (binary): eggs are either released into the open water after fertilization (free-  
228 spawning) or remain attached to the female in specialized egg-sacs until hatching (sac-  
229 spawning). Sac spawning copepods display lower fecundity rates and longer hatching times  
230 compared to free-spawners (Kiørboe & Sabatini, 1994).

231

### 232 2.3. Definition of functional groups

233 We used multivariate analysis and hierarchical clustering to identify functional groups of  
234 copepod species that show similar functional trait combinations and therefore constitute  
235 different functional units in marine ecosystems. Only those copepod species with a body size  
236 value and no missing data for three out of five functional traits (343 out of the 385 species)  
237 were retained in the analysis (Appendix S2). The species' trophic groups and feeding modes  
238 were re-coded binarily to accurately represent species that belong to several feeding modes/  
239 trophic groups (Appendix S2). This means that the analyses described below were performed  
240 on 343 species based on ten trait dimensions instead of the initial five dimensions.

241 Since the functional traits used represented both quantitative and qualitative variables, a factor  
242 analysis on mixed data (FAMD; Pagès, 2004) was used to investigate inter-species functional  
243 traits variance and estimate the functional distances between species. The use of a FAMD  
244 represented an improvement to the Multiple Correspondence Analysis (MCA) used in  
245 Benedetti et al. (2016) as it allowed to retain body size as a quantitative continuous variable  
246 instead of having to convert this trait into size classes. The FAMD reduced the dimensionality  
247 of the ten traits dataset by synthesizing them through a set of principal components (PCs) that  
248 described the main modes of functional trait variance. The number of retained FAMD  
249 components was chosen based on a leave-one-out cross-validation method where each object  
250 (i.e., species) is alternatively removed and predicted with a new FAMD model and a mean  
251 square error of prediction is calculated for each  $n$  components ranging from one to ten  
252 (Audigier et al., 2016). The mean square error was lowest for  $n =$  four components (error =  
253 0.028, whereas error  $>$  0.029 for all other values of  $n$ ) and those first four FAMD components  
254 explained 80.15% of the variability in inter-species trait variance. An Euclidean distance  
255 matrix was calculated from these four components to represent the inter-species functional  
256 distance resulting from the FAMD. To assess the quality of this dimension reduction analysis,  
257 we compared this Euclidean distance to a Gower distance matrix calculated directly from the  
258 trait data (10 dimensions) following the guidelines of Mouillot et al. (2021), We calculated  
259 the co-ranking matrix between the two distance matrices and determined how the dimension  
260 reduction distorted the initial inter-species functional distance using the area under the curve



261 (AUC) criterion, which should be  $> 0.7$  according to Mouillot et al. (2021). We found an  
262 AUC criterion of 0.81 which supports the “excellent” quality of our dimension reduction  
263 analysis (Mouillot et al., 2021). We used hierarchical clustering and Ward’s agglomeration  
264 link to generate the functional dendrogram. The number of clusters (i.e., FGs) was then  
265 chosen by the height at which the dendrogram is “cut”.  
266 We cared to investigate the sensitivity of the resulting FGs to the main parameters of our  
267 clustering approach (see Appendix S4 for results not reported below): (i) the effect of  
268 including species with missing values in the FAMD compared to restricting the pool to those  
269 species without any missing trait value (283 instead of 343; Appendix S2), (ii) the choice of  
270 the distance metric (Euclidean distance matrix based on FAMD components *versus* Gower’s  
271 distance matrix based on the trait values), and the agglomeration link (Ward’s aggregation  
272 link versus average link; Mouchet et al., 2008). Therefore, four combinations of distance  
273 matrices and agglomeration links were considered for two subsets of the species traits data.  
274 Including 60 copepod species with some missing trait values affected the structure FAMD  
275 space only marginally (Fig. S4.1) and did not change the number of components to be  
276 retained ( $n = 4$ ), nor did it change their amount of explained variance (80.15%). Therefore,  
277 the FAMD including 343 species was kept as the standard since it allowed for a larger pool of  
278 species. To quantify the quality of the clustering procedure, four internal cluster stability  
279 indices (Calinski-Harabasz index, Connectivity, Dunn’s index, and average silhouette width)  
280 were calculated for each dataset, distance matrix choice, agglomeration link choice and for a  
281 number of clusters ranging from three to 13 (Figs. S4.2 and S4.3). Plus, Baker’s Gamma  
282 correlation coefficients (Baker, 1974) were computed between each functional dendrogram  
283 stemming from the four different combinations of distance metrics and agglomeration links to  
284 examine their pairwise similarity (Table S4.1). Lastly, we performed a careful expert  
285 inspection of each dendrogram and resulting FGs to further evaluate their similarity and  
286 ensure the ecological relevance of the final FGs (i.e., avoid few large groups that are  
287 functionally heterogenous or numerous small groups that are functionally redundant).  
288 Ultimately, eleven FGs were identified (Table S4.2).

289

## 290 2.4. Species distribution modelling

### 291 2.4.1. Environmental predictor selection

292 We considered 14 environmental predictors that drive the spatial ranges of copepod species in  
293 the open ocean and that are commonly used to model their abiotic habitats (see Benedetti et  
294 al., 2021 and references therein). A more exhaustive description of the data coverage and

295 initial resolution is given in Appendix S5. First, five predictors were retrieved from the World  
296 Ocean Atlas (WOA, version 2013v2): sea surface temperature (SST, °C), dissolved oxygen at  
297 175 m depth ( $\text{dO}_2$ ,  $\mu\text{ml l}^{-1}$ ), nitrate concentration ( $\text{NO}_3^-$ ,  $\mu\text{M}$ ), phosphate concentration ( $\text{PO}_4^{3-}$ ,  
298  $\mu\text{M}$ ), silicate concentration ( $\text{SiO}_2$ ,  $\mu\text{M}$ ). The products  $\text{N}^*$  and  $\text{Si}^*$  were derived from the  
299 monthly climatologies of the above-mentioned nutrient fields:  $\text{N}^*$  refers to the excess of  $\text{NO}_3^-$   
300 to  $\text{PO}_4^{3-}$  relative to the Redfield ratio ( $\text{N}^* = [\text{NO}_3^-] - 16[\text{PO}_4^{3-}]$ ) and can be used as a tracer of  
301 denitrification and  $\text{N}_2$  fixation.  $\text{Si}^*$  is the excess of  $\text{SiO}_2$  to  $\text{NO}_3^-$  ( $\text{Si}^* = [\text{SiO}_2] - [\text{NO}_3^-]$ ) and is  
302 relevant to diatom growth, as healthy diatoms take up silicate and nitrate in a one-to-one ratio  
303 (Sarmiento & Gruber, 2006). Several additional variables were considered as they represent  
304 complementary niche axes: surface wind speed (Wind,  $\text{m s}^{-1}$ ); eddy kinetic energy (EKE,  $\text{m}^2$   
305  $\text{s}^{-2}$ ) computed according to the algorithm of Qiu and Chen (2004) as a proxy for mesoscale  
306 activity; chlorophyll-a concentration (Chl,  $\text{mg m}^{-3}$ ) as a proxy of surface phytoplankton  
307 biomass; surface carbon dioxide partial pressure ( $\text{pCO}_2$ ,  $\mu\text{atm}$ ); photosynthetically active  
308 radiation (PAR,  $\mu\text{mol m}^{-2} \text{s}^{-1}$ ); and mixed-layer-depth (MLD, m). Also, photosynthetically  
309 available radiation (PAR) over the MLD (MLPAR,  $\mu\text{mol m}^{-2} \text{s}^{-1}$ ) was added as an indicator of  
310 available light within the mixed layer. For  $\text{NO}_3^-$ ,  $\text{PO}_4^{3-}$ ,  $\text{SiO}_2$ , Chl and EKE, we added their  
311 log-transformed fields to achieve distributions that are closer to a normal distribution. The  
312 monthly climatologies of all predictor variables were all projected onto the  $1^\circ \times 1^\circ$  cell grid of  
313 the WOA and their values were matched with the monthly species occurrence data.

314 We used a two-stage procedure to select the environmental predictors of the SDMs (section  
315 2.4.3 for the models set up). First, we removed collinear predictors to avoid increasing the  
316 uncertainty in regression models projections through coefficients inflation (Dormann et al.,  
317 2013). The collinearity of predictors at the global scale and at the FGs-level was calculated  
318 for each species through pairwise Spearman's rank correlation coefficients. When a pair of  
319 predictors displayed an average correlation coefficient above the widely used  $|0.7|$  threshold  
320 (Dormann et al., 2013), the predictor closest to a normal distribution was kept. This first step  
321 narrowed down our initial 14 predictors to the following ten: SST, PAR,  $\log\text{NO}_3$ , MLD,  
322  $\log\text{Chl}$ ,  $\log\text{EKE}$ ,  $\text{Si}^*$ ,  $\text{N}^*$ , Wind, and  $\text{pCO}_2$ . Second, to avoid model overfitting the number of  
323 environmental predictors included in the SDMs was restricted to five to achieve a 10:1 ratio  
324 of occurrences to predictors, following Guisan et al. (2017). To choose the five most  
325 influential predictors, univariate random permutation tests were performed ( $n = 30$  repetitions;  
326 Appendix S6). For each species and SDMs, one of the ten potential predictors was randomly  
327 reshuffled while the other nine were kept as is and SDMs were trained based on this  
328 reshuffled dataset. Then, a correlation coefficient was calculated between the original vector

329 of unshuffled model prediction and the vector of predictions resulting from the reshuffled  
330 dataset. The higher the correlation coefficient, the lower the importance of the reshuffled  
331 predictor on the final SDM prediction. We chose the top five predictors for each FG and SDM  
332 separately (Appendix S6). These were then used to train the SDMs used for global habitat  
333 projections. For those species that could not be assigned to a FG due to missing functional  
334 traits data, the five predictors displaying the highest ranks of relative importance across all  
335 species combined were used in the SDMs (Appendix S6).

336

#### 337 2.4.2. Background data

338 Correlative SDMs such as the ones used here require both presence and absence data. Yet, the  
339 occurrence data used here typically lack absence data, therefore pseudo-absence data were  
340 generated (Benedetti et al., 2021). We followed the target-group approach of Phillips et al.  
341 (2009) which is appropriate to model plankton species distributions based on their relatively  
342 sparse data (Righetti et al., 2019; Benedetti et al., 2021). First, we investigated the spatial  
343 distribution of the occurrence data of each FG separately. All FGs displayed similar patterns  
344 of sampling effort except for FG2, FG4 and FG11 (Appendix S4), which had very few  
345 occurrences in the Southern Ocean and the North Atlantic Ocean (Appendix S1). Therefore,  
346 we chose to draw pseudo-absences from the total pool of sites (i.e., monthly 1° x 1° grid cells)  
347 that displayed at least ten occurrences of all species included, except for those species  
348 belonging to the three groups above. For species of FG2, FG4 and FG11, pseudo-absences  
349 were only drawn from those sites where at least 10 different species of their FG were found  
350 (i.e., their "target group"). The threshold of ten occurrences per site was chosen to avoid  
351 relying on those sites where only a small fraction (e.g., only one or two species) of the overall  
352 copepod community was detected. Once the sites were defined, the pseudo-absences of each  
353 species were randomly drawn based on their occurrences in both their corresponding target  
354 groups. This way, a species' background is located at the sites where its lack of presence is  
355 most likely to reflect an actual absence. For each species, ten times more background data  
356 than presences were generated following the guidelines of Barbet-Massin et al. (2012), and  
357 presences were weighted ten times more than pseudo-absences.

358

#### 359 2.4.3. Model configuration and habitat suitability projections

360 Following Benedetti et al. (2021), we developed an ensemble modelling approach that  
361 combined three SDMs types which were configured to avoid model overfitting (Merow et al.,  
362 2014): Generalized Additive Models (GAMs), Generalized Linear Models (GLMs), and

363 Artificial Neural Networks (ANNs). The GLM were run using a quadratic formula and a logit  
364 link function. The GAMs were also set up to use a logit link function and a maximum of five  
365 smoothing terms. ANNs were run using five cross validations with 200 iterations to optimize  
366 number of unities in the hidden layer and the parameter for weight decay (Thuiller et al.,  
367 2016). The SDMs were trained on 80% of the presence/pseudo-absence data chosen at  
368 random and tested on the remaining 20%. For each SDM, ten random cross evaluations runs  
369 were carried out. For each cross-validation run, the true skill statistic (TSS) was calculated to  
370 evaluate model performance. Only species displaying a mean TSS score >0.30 were used for  
371 the final species and functional trait projections.

372 The SDMs were then projected in the conditions of the global ocean as a function of all  
373 monthly climatologies of the environmental predictors included in the model to obtain  
374 species-level maps of habitat suitability indices (HSI). Since we used FGs-specific and SDM-  
375 specific sets of predictors, the SDMs vary in number of successfully modelled species (254  
376 for GAM, 244 for ANN, and 238 species for GLM). For each FG, annual mean HSI values  
377 were obtained by averaging the monthly HSI maps across each species constituting the FG  
378 and SDMs. These mean annual HSI estimates indicate which regions are suitable for each  
379 species/FG.

380

### 381 2.5. Positioning FGs in environmental niche space

382 Following the approach of Benedetti, Vogt, et al. (2018), the mean univariate response curves  
383 emerging from the GAMs were used to estimate the relative optimal conditions (i.e., niche  
384 center) and tolerance (i.e., niche width) for each species and predictor (see Appendix S7). The  
385 niche center was calculated as the weighted median and the niche width as the difference  
386 between the weighted 10<sup>th</sup> and 90<sup>th</sup> percentiles. The HSI values were used as weights. For this  
387 analysis, a set of eight predictors common to all species (i.e., unlike the top five FG-specific  
388 predictors used for mapping, as described in section 2.4.1) had to be defined based on the  
389 ranking of predictors (Appendix S6): SST, logChl, logNO<sub>3</sub>, MLD, Si\*, PAR, N\* and logEKE.  
390 Eight predictors were chosen to cover all top ranking predictors based on the overall rankings.  
391 To investigate the inter-species and inter-FGs similarities in the above-mentioned niche  
392 characteristics and test if the FGs present distinct environmental niches, a principal  
393 component analysis (PCA; Legendre & Legendre, 2012) was performed on the niche centers  
394 and niche widths for all 8 predictors to ordinate the species according to their niche center and  
395 niche width. This space composed by the principal components (PCs) of the PCA is hereafter  
396 referred to as the niche space. To explore whether FGs differ significantly in their position in

397 niche space, we averaged the PCs scores of each FG based on the scores of their constituting  
398 species. Non-parametric variance analysis (Kruskal-Wallis tests) was carried out to test if FGs  
399 differ in their position in niche space). Post-hoc variance analyses (Dunn's test with a p-  
400 values adjustment following Bonferroni's method) were then performed to identify the pairs  
401 of FGs that displayed significant variations in niche space positions.

402

#### 403 2.6. Community weighted median (CWM) proportions of traits

404 On top of projecting the FGs-specific mean annual patterns of HSI, the CWM trait values for  
405 body size, trophic group, feeding mode, myelination, and spawning mode were computed to  
406 explore the biogeography of copepod traits. All qualitative traits were mapped by calculating  
407 a CWM trait value based on the monthly species-specific HSI values as weights. More  
408 precisely, for each grid cell and month, the CWM proportion was calculated as the sum of all  
409 HSI values belonging to species exhibiting that trait over the sum of HSI values across all  
410 species in that community (i.e. all the species in that grid cell). For body size (i.e., the only  
411 continuous trait), we calculated the weighted median body size for each community, again  
412 using monthly HSI values as weights. The CWM values were calculated according to Cormen  
413 et al. (2009) using the matrixStats R package. Like for FGs, monthly CWM projections were  
414 performed for every SDM type and mean annual CWM trait values were derived based on the  
415 ensemble of projections (Appendices S8 and S9).

416

#### 417 2.7. Ocean regionalization based on functional trait biogeography

418 To explore sub-global patterns of traits and FGs expression rather than reporting results for  
419 broad latitudinal bands (e.g., going beyond the tropics *versus* the poles), clustering was used  
420 to divide the global ocean into regions that displayed similar trait expressions (e.g., mean  
421 annual projections of CWM body size, and CWM values of each trophic groups, feeding  
422 modes, myelination, and spawning mode; Appendix S10). First, the spatial patterns of the  
423 twelve CWM traits values were summarized through a PCA again (Appendix S10) and the  
424 scores of each grid cell along the first four PCs (97.9% of total variance explained) were used  
425 to derive a global Euclidean distance matrix. Second, following the same approach as in  
426 section 2.3 and in Benedetti et al. (2021), various clustering approaches were explored based  
427 on this distance matrix (three hierarchical clustering approaches and two widely used  
428 partitioning approaches) and three internal cluster stability metrics (Dunn's index,  
429 Connectivity, and the average silhouette width) were used to help us find an optimal number  
430 (k) of regions (see Appendix S11). The three hierarchical approaches consisted in using three

431 alternative agglomeration linkages (average, complete and Ward's; Legendre & Legendre,  
432 2012). The stability metrics enabled us to discard the two partitioning methods (kmeans and  
433 partitioning around medoids; Fig. S11.1) and to narrow k down to 3 to 8 regions (Fig. S11.2).  
434 Ultimately, we chose to present the CWM trait patterns obtained for  $k = 4$  under Ward's  
435 linkage based on the profiles of cluster stability metrics and because this linkage methods  
436 minimizes intra-cluster variance. Values of  $k > 4$  simply lead to smaller regions nested in  
437 those obtained for  $k = 4$ .

438

### 439 **3. Results**

#### 440 3.1. Copepod FGs

441 The 343 copepod species retained were clustered based on their combinations of body size,  
442 feeding mode, trophic group, myelination, and spawning mode. Eleven FGs could be derived  
443 from the functional dendrogram, which reflects inter-species functional similarity (Fig. 1;  
444 Appendix S4). The first dichotomy in the dendrogram occurred between the small to medium-  
445 sized cruise feeders (FG1, 2, 3) and other feeding modes. FG1 was composed of 14 species  
446 that are small (median  $\pm$  IQR =  $1.10 \pm 0.52$  mm) cruise-feeding herbivores. Almost all species  
447 (13 out of 14) were sac-spawning and myelinated species. All but one species belonged to the  
448 *Clausocalanus* genera. FG2 was defined by small ( $0.80 \pm 0.30$  mm) cruise-feeding  
449 detritivores. The 22 species of this group were all amyelinated and sac-spawning. All species  
450 in group 2 belonged to the Oncaeidae family. FG3 was composed of 46 medium-sized ( $2.61 \pm$   
451  $1.70$  mm) detritivores. Most species in FG3 were myelinated (74%) and free-spawning (80%).  
452 Cruise- and current-feeding were the two predominant feeding modes, with *Spinocalanus*,  
453 *Metridia* and *Scaphocalanus* being the dominant genera in this FG.

454 The second dichotomy in the dendrogram separated the small and large sac-spawning  
455 carnivores (FG4 and 5) from the rest. FG4 consisted of 29 small ( $1.22 \pm 0.70$  mm)  
456 carnivorous ambush-feeders. They were all sac-spawning and amyelinated. The 29 species  
457 were part of the Corycaeidae family and thus belonged to either the *Corycaeus*, *Farranula* or  
458 *Vetoria* genera. FG5 was made up of 29 species of large ( $4.58 \pm 2.75$  mm) sac-spawning  
459 current- and cruise-feeding carnivores from the Sapphirinidae and Euchaetidae families.

460 The third dichotomy of the dendrogram separated the large and medium-sized current feeders  
461 (FG6 and 7) from the rest. FG6 was a group of 13 very large ( $6.80 \pm 2.15$  mm) species that  
462 were either current-feeding herbivores (85%) or fully omnivorous (15%). They were all  
463 myelinated free-spawners. The two most represented genera were *Calanus* and *Eucalanus*.  
464 FG7 was the largest FG with 55 medium-sized ( $1.80 \pm 2.26$  mm) and current-feeding

465 herbivores. Most were myelinated (95%) and free-spawning (89%). The main genera  
466 contributing to the composition of FG7 were *Calanus*, *Calocalanus* and *Paracalanus*.  
467 The fourth dichotomy occurred between the small and medium-sized omnivores and the  
468 medium free spawning carnivores (FG8). FG8 consisted of 49 medium-sized ( $3.40 \pm 1.7$  mm)  
469 omnivorous-carnivorous species which were predominantly amyelinated (86%) and free-  
470 spawning (80%). This diverse group mixed current- (60%) and ambush-feeders (40%) and  
471 gathered 12 genera with *Candacia*, *Haloptilus* and *Heterorhabdus* being the most dominant.  
472 FG9 was composed of 40 medium-sized ( $2.76 \pm 1.98$  mm), current-feeding omnivorous  
473 species. All were free-spawning and mostly amyelinated (72%). *Pleuromamma*, *Gaetanus*,  
474 and *Labidocera* were the main genera.  
475 Finally, the fifth and last main dichotomy separated the small and medium-sized mixed-  
476 feeding omnivores (FG11) from the small ambush feeders (FG10). FG10 was also rather  
477 homogeneous and contained 14 small ( $1.10 \pm 0.52$  mm), ambush-feeding, amyelinated and  
478 sac-spawning omnivores. All species belonged to either the *Oithona* or the *Dioithona* genera  
479 from the Oithonidae family. FG11 was a group of 32 small ( $1.50 \pm 0.67$  mm) species  
480 predominantly belonging to the *Acartia* and *Centropages* genera. The species belonging to  
481 *Acartia* were omnivorous-herbivorous, whereas the others were omnivorous. All species in  
482 FG11 were amyelinated free-spawning current-ambush feeders.  
483

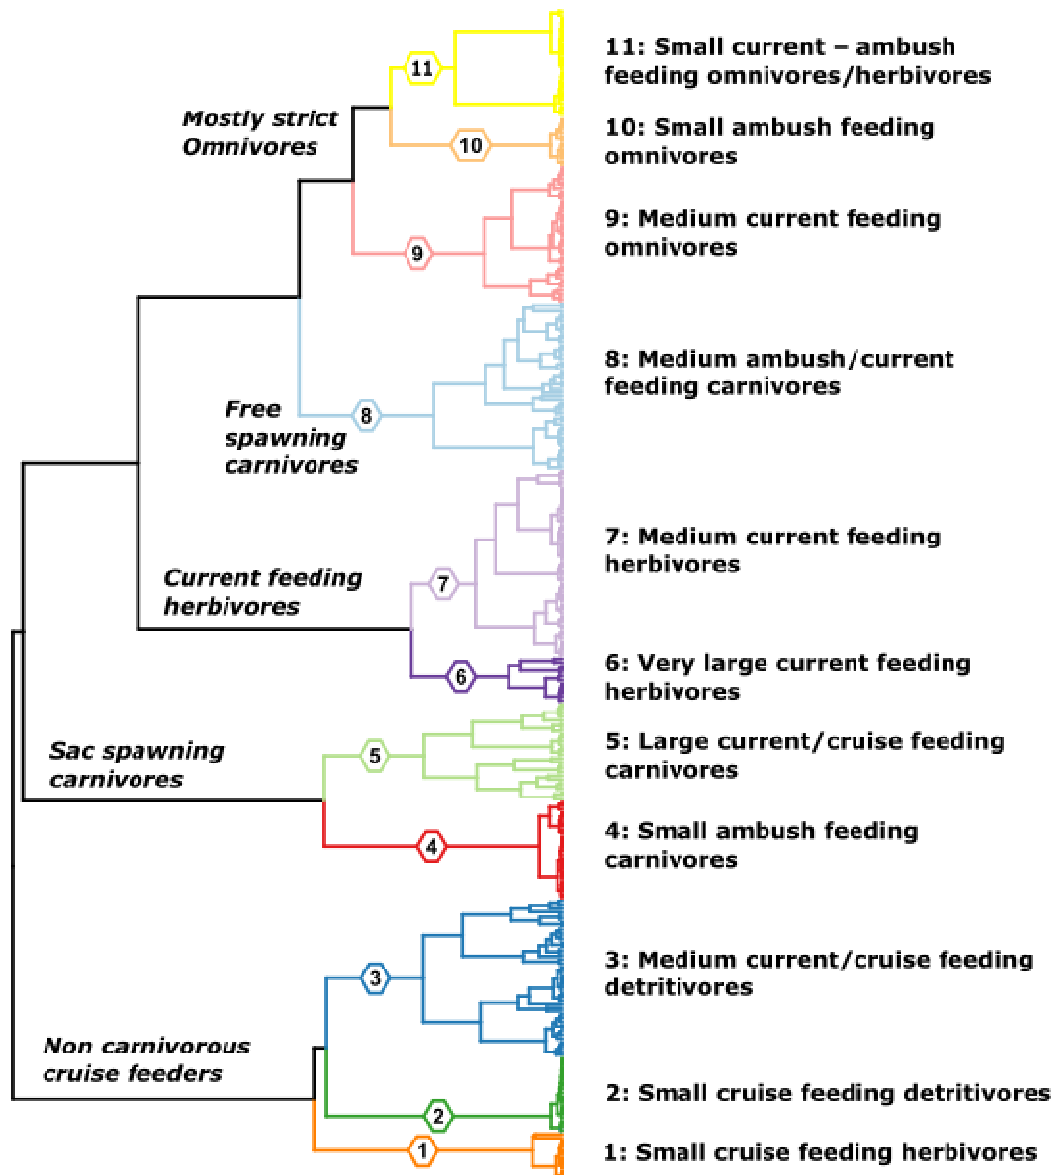

484

485 *Figure 1:* Functional dendrogram representing the inter-species traits dissimilarity for 343  
486 copepod species based on their functional trait combinations. The hierarchical clustering was  
487 performed on a Euclidean distance matrix issued from the species coordinates ensuing from a  
488 Factor Analysis of Mixed Data (FAMD). Each leaf of the functional dendrogram represents a  
489 copepod species and the eleven functional groups (FGs) identified through the hierarchical  
490 clustering approach are numbered and highlighted in color. The main taxonomic groups  
491 representing the FGs are as follows: FG1: *Clausocalanus* spp.; FG2: Oncaeidae; FG3:  
492 *Spinocalanus*, spp., *Scaphocalanus* spp. and *Metridia* spp.; FG4: Corycaeidae; FG5:  
493 Sapphirinidae and Euchaetidae; FG6: Calanidae; FG7: *Paracalanus* spp., *Calocalanus* spp.,  
494 and *Calanus* spp.; FG8: *Haloptilus* spp., *Heterorhabdus* spp. and *Candacia* spp.; FG9:  
495 *Pleuromamma* spp., *Gaetanus* spp., and *Labidocera* spp.; FG10: Oithonidae; FG11: *Acartia*  
496 spp. and *Centropages* spp.

497



498 The functional space defined by the PCs of the FAMD (Appendix S12) served as an  
499 alternative description of the reduced functional space. The first four PC of the FAMD  
500 explained 79.21% of the total variance in functional traits. The largest functional distance  
501 along the first component was found between FG4 and FG6. The Euclidean distance matrix  
502 represented on the functional dendrogram (Fig. 1) was compared to a Gower distance matrix  
503 computed from the functional traits (i.e., no dimension reduction; Appendix S4) based on the  
504 AUC criterion. We found an AUC of 0.808, which indicated that the reduced FAMD space  
505 results in a fairly good representation of the inter-species functional dissimilarity according to  
506 Mouillot et al. (2021). Furthermore, the importance of a functional trait in scoring the  
507 functional space was quantified by examining the drop in AUC score if said trait was omitted.  
508 Body size was found to be the most important (-0.322 in AUC), followed by trophic group (-  
509 0.265), feeding mode (-0.163), spawning mode (-0.091), and myelination (-0.063).

510

### 511 3.2. FGs in environmental niche space

512 The environmental niches of the copepod species were described by their univariate niche  
513 centers and widths for the top eight predictors we defined as part of our core set or predictors  
514 (section 2.5, Appendix S6), and these were used to examine FGs position in niche space based  
515 on a PCA (Fig. 2; see Appendix S13 for PCs 3 and 4). The niche characteristics that  
516 contributed the most positively to PC1 (relative contribution to PC1 given in brackets when  
517 >5%) were: logChl center (12.16%), logChl width (12.51%), EKE width (11.78%), MLD  
518 center (9.96%), MLD width (10.78%), N\* width (7.48%), Si\* width (5.64%) and Si\* center  
519 (5.19%). The species with negative scores on PC1 were those that are characterized by higher  
520 SST width (5.65%) and N\* center (4.45%). The three most important niche characteristics  
521 scoring PC2 were: Si\* center (30.88%), Si\* width (27.90%) and SST center (11.17%). Species  
522 with positive PC1 scores were those affiliated with wider niches and conditions of higher  
523 concentrations of nutrients and chlorophyll-a, stronger seasonal variations, and overall higher  
524 water column turbulence and mixing.

525

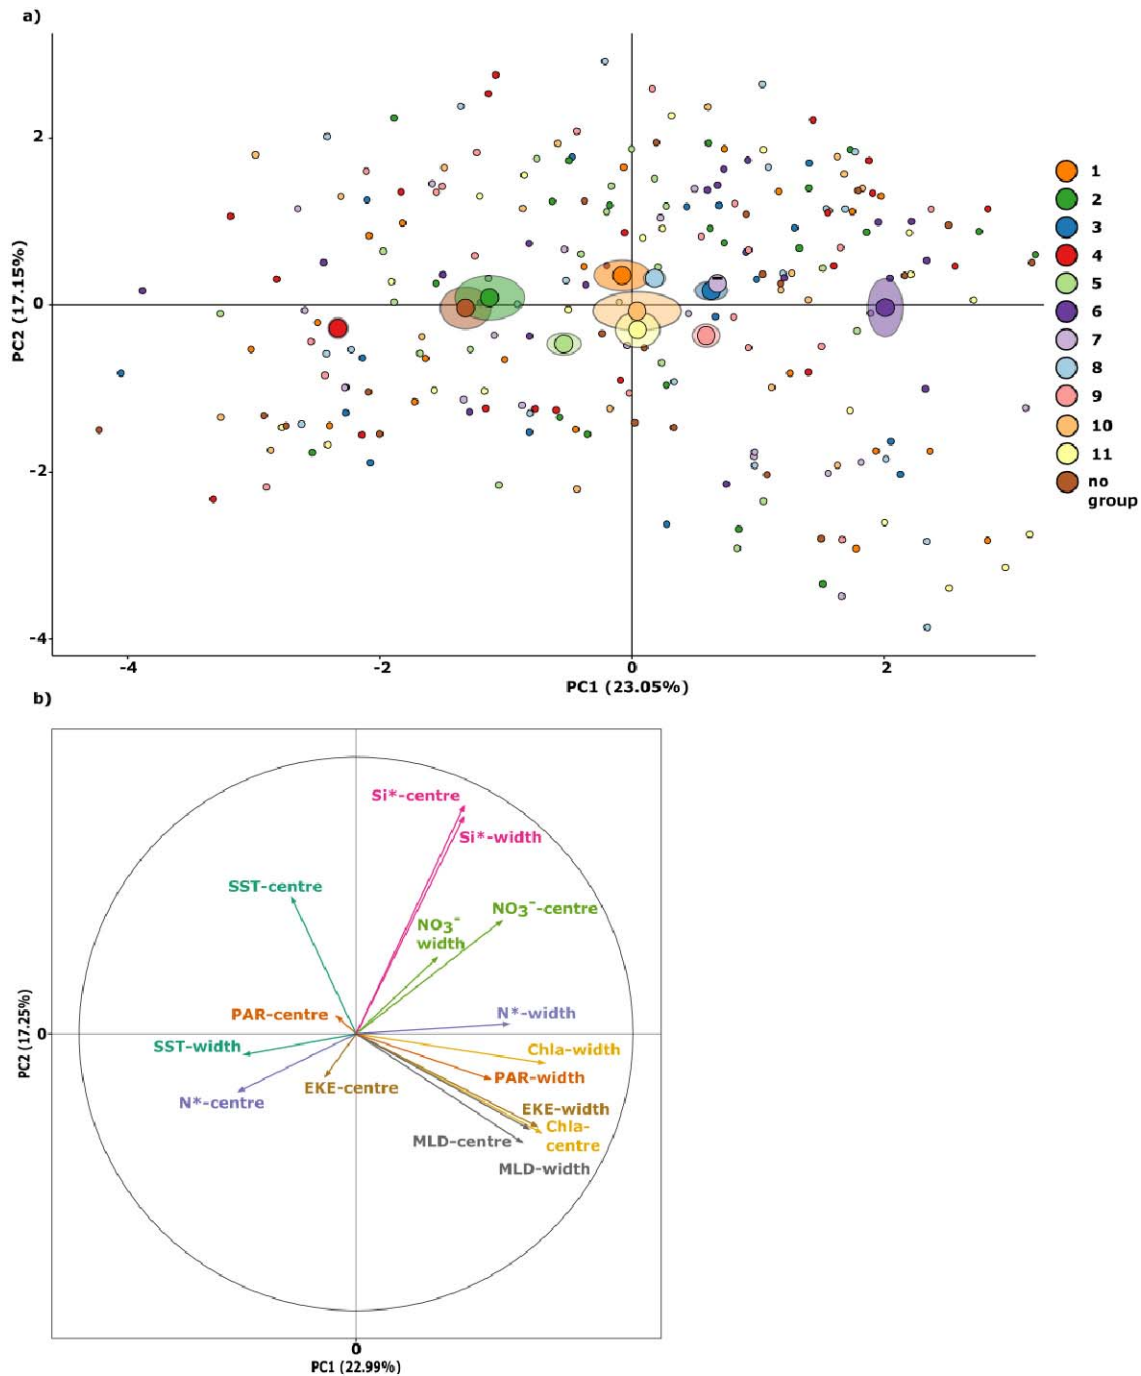

526

527 **Figure 2:** Position of a) functional groups (FGs, larger circles) and species (smaller circles) in  
528 environmental niche space according to the first two principal components (PCs) of a  
529 principal component analysis (PCA) performed on b) the species-level niche characteristics  
530 derived from GAM-based univariate response curves of the chosen environmental predictors.  
531 Niche centers were calculated as the weighted median value of the corresponding predictor as  
532 an estimate of the species' optimum for each predictor. Niche widths were calculated as the  
533 range between the weighted 10<sup>th</sup> and 90<sup>th</sup> quantiles and estimate the relative tolerance range of  
534 the species to the corresponding predictor. The semi-transparent ellipses indicate two times  
535 the value of the standard errors associated with the mean PC scores of the FGs.

536

537 Post-hoc variance analyses showed significant (Dunn's tests;  $p < 0.05$ ) inter-FGs variations in  
538 niche characteristics and PC scores (see Appendix S14). The largest distance in niche space  
539 (PC1) was found between FG4 and FG6 (Fig. 2a;  $p = 6.5e-10$ ). Along PC1, FG4 also differed  
540 significantly from FG1 ( $p = 0.042$ ), FG3 ( $p = 1.6e-06$ ), FG7 ( $p = 1.3e-08$ ), FG8 ( $p = 1.4e-4$ ),  
541 FG9 ( $p = 2.3e-06$ ), FG10 ( $p = 0.011$ ) and FG11 ( $p = 0.005$ ). Conversely, FG6 differed  
542 significantly from FG2 ( $p = 4.5e-4$ ), FG5 ( $p = 0.001$ ) and FG8 ( $p = 0.049$ ) along PC1. FG6  
543 also differed significantly from FG2 ( $p = 0.001$ ) and FG5 ( $p = 0.002$ ). None of the FGs did  
544 showed significant variations along PC2. Only FG3 and FG7 showed significant variations  
545 along PC3 ( $p = 4.2e-3$ ; Appendices S13 and S14). To summarize, when FGs 4 and 6 were not  
546 accounted for, none of the remaining nine FGs showed significant variations in PC1 and PC2  
547 scores (all  $p > 0.05$ ). This was due to the high level of inter-FG environmental niche  
548 characteristics overlap, which implies that distinct FGs display broad environmental niches  
549 and can share similar abiotic habitats.

550

### 551 3.3. Mean annual habitat suitability indices (HSI) patterns

552 For all three SDMs and 11 FGs combined, we found SST to be the most important predictor  
553 for constraining the models, followed by PAR,  $\log\text{NO}_3$ , MLD,  $\log\text{Chl}$ ,  $\log\text{EKE}$ ,  $\text{Si}^*$ ,  $\text{N}^*$ ,  
554 Wind, and  $\text{pCO}_2$  (Appendix S6). SST remained the most important predictor for every FG  
555 when looking at predictor importance per FG. Therefore, most FGs displayed mean annual  
556 HSI patterns that were driven by the latitudinal temperature gradients at the first-order. The  
557 impact of second-order predictors became clearer on a sub-global scale. Aggregating the  
558 average monthly HSI projected across SDMs per FG allowed us to estimate their mean annual  
559 habitat suitability patterns (Fig. 3).

560

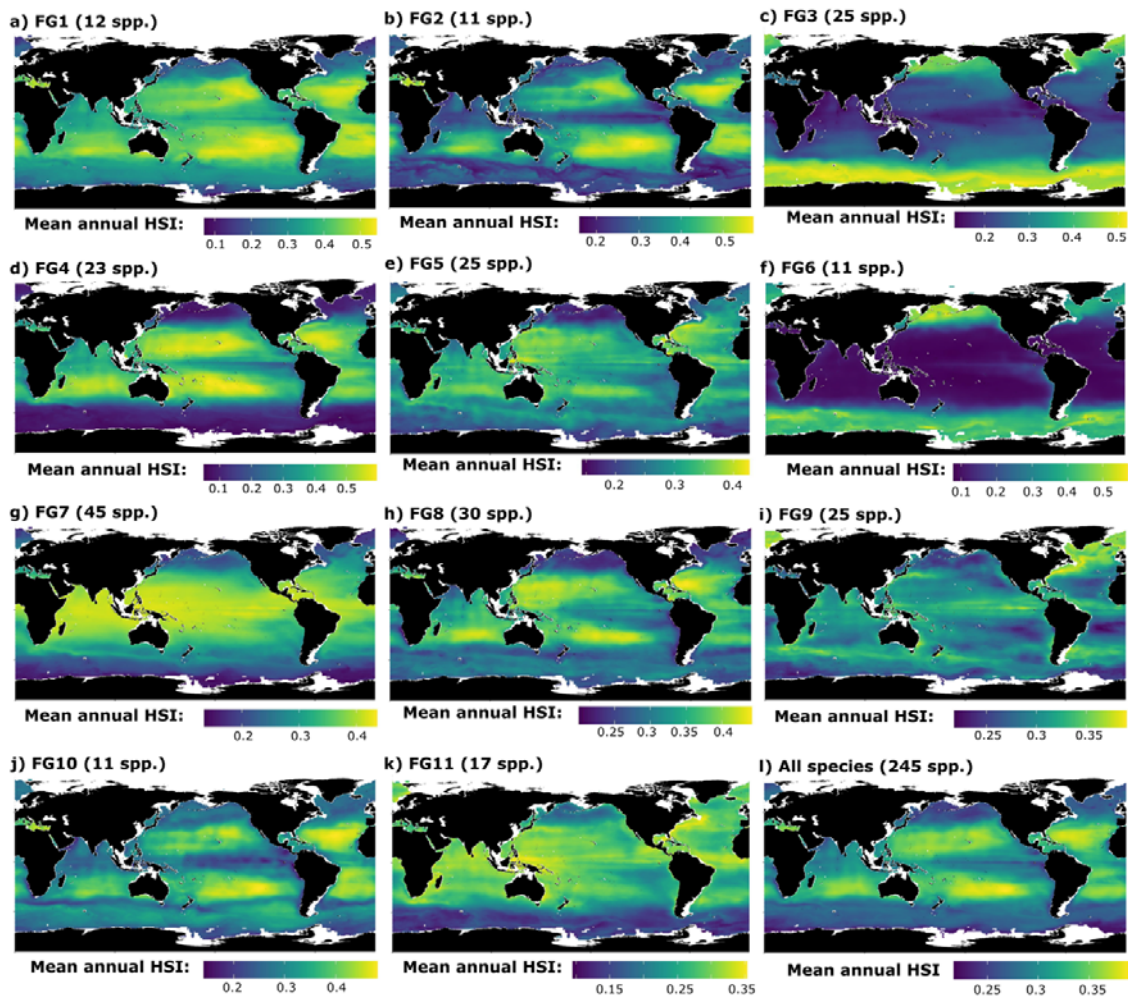

561

562 **Figure 3:** Maps of mean annual habitat suitability index (HSI) the eleven copepod functional groups  
563 (FG) identified in the present study: a) FG1 (small myelinated cruise-feeding omnivores-herbivores),  
564 b) FG2 (small non myelinated cruise-feeding detritivores), c) FG3 (medium-sized myelinated mixed-  
565 feeding or cruise-feeding detritivores), d) FG4 (small amyelinated ambush-feeding carnivores), e) FG5  
566 (large current- or cruise-feeding carnivores), f) FG6 (very large myelinated current-feeding  
567 omnivores-herbivores), g) FG7 (medium-sized myelinated current-feeding omnivores-herbivores), h)  
568 FG8 (medium-sized amyelinated ambush- or current-feeding carnivores), i) FG9 (medium-sized  
569 amyelinated current-feeding omnivores), j) FG10 (small amyelinated ambush-feeding omnivores), k)  
570 FG11 (small amyelinated mixed-feeding omnivores) and for l) all species together. Mean annual  
571 estimates were derived from the 12 monthly estimates of mean HSI obtained for each of the three  
572 species distribution models (SDMs) used (generalized linear models, generalized additive models and  
573 artificial neural networks). The FG were defined based on the functional traits combinations of the 245  
574 copepod species described by a factorial analysis on mixed data (FAMD) whose principal components  
575 were used to perform hierarchical clustering on a Euclidean distance matrix with Ward's aggregation  
576 link.

577

578 The mean annual HSI of FG3 was found to be maximal towards the poles and decrease  
579 progressively towards the equator. In contrast, the mean annual HSI of FG1, FG2, FG4, FG8,  
580 and FG10 were found to be highest in the tropics and decreased towards higher latitudes. For  
581 those five FGs, slighter decreases in HSI were modelled towards the tropical upwelling

582 systems (e.g., Peru, Benguela), the northern part of the Indian Ocean and the Pacific  
583 Equatorial counter current. Therefore, these five FGs reached maximal HSI in the  
584 oligotrophic conditions of the tropical gyres. Meanwhile, FG5, FG9, and FG11 show less  
585 marked latitudinal gradients in mean annual HSI values. No clear hotspot in HSI could be  
586 found for these three FGs, but they all displayed lower HSI in higher latitudes than in the  
587 tropics. Yet, the region where their mean annual HIS was lowest varied between groups: the  
588 North Pacific and parts of the Southern Ocean for FG5 and FG9, the whole Southern Ocean  
589 for FG11. The mean annual HSI pattern of FG7 followed the annual SST gradient very  
590 closely, with maximal HSI values near the equator and progressive decrease towards the  
591 poles.

592

### 593 3.4. Functional trait biogeography from CWM trait values and regionalization

594 We projected the CWM body size and the CWM values of trophic group, feeding mode,  
595 spawning mode, and myelination for the global open ocean on a mean annual scale to  
596 illustrate the biogeography of these key traits (Appendix S9). To summarize the main spatial  
597 gradients of trait biogeography and assess how these could overlap with known large scale  
598 oceanographic currents (i.e., currents and fronts), the global ocean was clustered based on  
599 similarities in CWM values after reducing their dimensionality (see Appendices S10 and  
600 S11). We identified four ocean regions that display significant contrasts in CWM trait  
601 proportions (Fig. 4; Appendix S15).

602

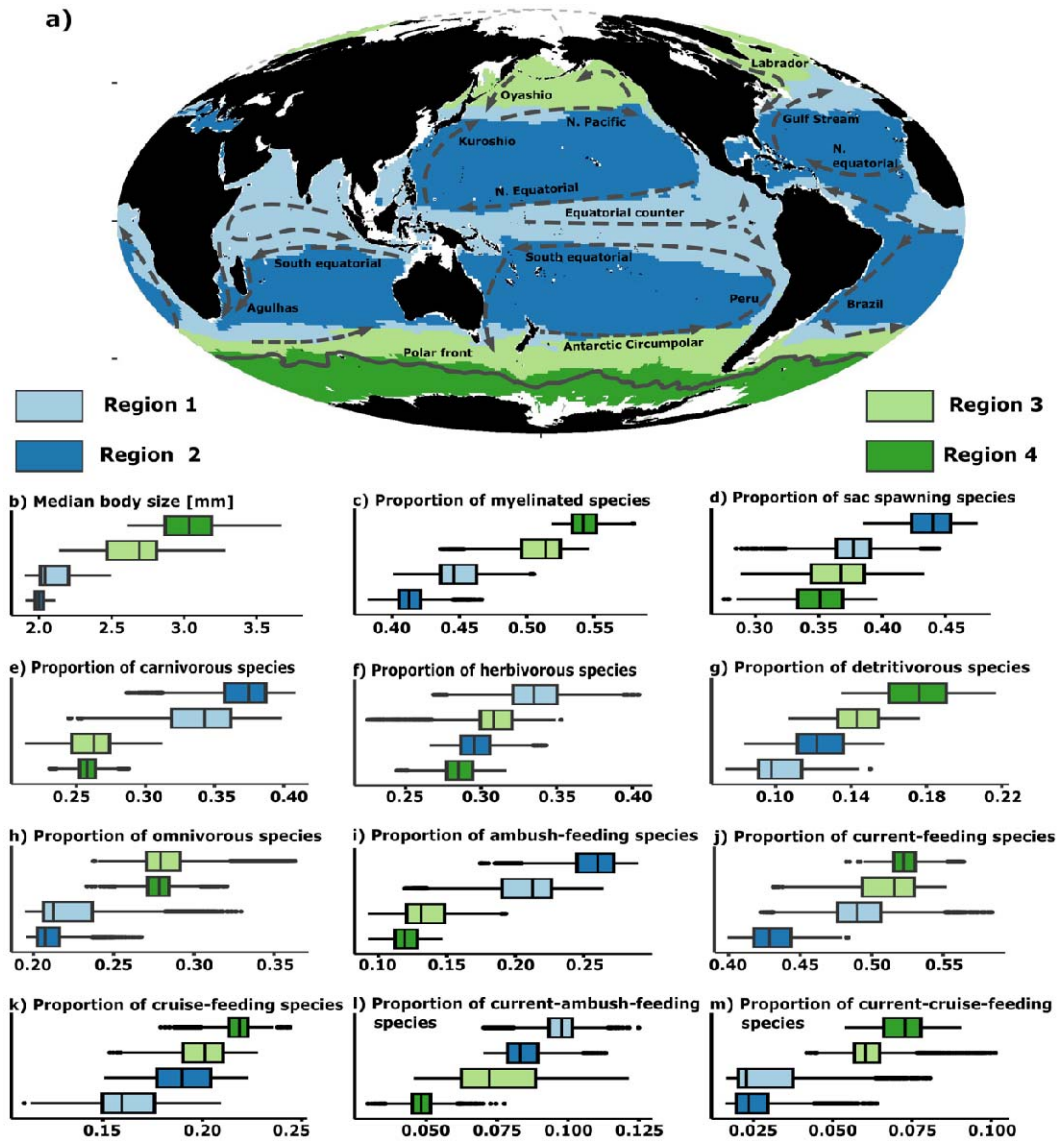

603

604 **Figure 4:** The global ocean divided into a) four regions according to the principal components of a  
 605 Principal Component Analysis (PCA) based on the CWM values of the functional traits. Major  
 606 oceanographic circulation features (i.e., surface currents and fronts) are illustrated through dashed  
 607 arrows to highlight their overlap between the regions' boundaries. The distribution of CWM trait  
 608 values between the four regions are shown through the boxplots: b) median body size, CWM values of  
 609 c) myelinated species, d) sac spawning species, e) carnivores, f) herbivores, g) detritivores, h)  
 610 omnivores, i) ambush-feeders, j) current-feeders, k) cruise-feeders, l) current-ambush-feeders, and m)  
 611 current-cruise-feeders. The position of the Antarctic Polar Front was taken from Orsi and Harris  
 612 (2019). The positions of the main large-scale ocean currents were drawn according to Pidwirny  
 613 (2006). The lower, middle, and upper boundaries of the boxplots correspond to the 25th, 50th, and  
 614 75th percentiles respectively. The lower and upper whiskers extend no further than 1.5\*IQR  
 615 (interquartile range) from the lower and upper hinges.

616

617 Region 1 primarily fell within the equatorial band and comprised coastal upwelling regions  
 618 and the main oxygen minimum zones. The copepod communities of Region 1 displayed lower

619 CWM body size (median  $\pm$  IQR = 2.043 mm  $\pm$  0.194), higher proportions of carnivores  
620 (0.342  $\pm$  0.040) and herbivores (0.335  $\pm$  0.029) but lower proportions of omnivores (0.213  $\pm$   
621 0.030) and detritivores (0.098  $\pm$  0.023). The CWM values of myelinated (0.446  $\pm$  0.026), sac-  
622 spawning (0.377  $\pm$  0.026), and ambush-feeding (0.212  $\pm$  0.036) species were lower than the  
623 CWM traits values found for the communities of Region 2 and higher than those found for the  
624 high latitude communities of Regions 3 and 4 (Appendix S13).

625 Region 2 comprised the tropical gyres. We found that communities in Region 2 showed the  
626 lowest CW median body size (2.002  $\pm$  0.057 mm) but the highest CWM values of ambush-  
627 feeding (0.259  $\pm$  0.027) carnivorous (0.372  $\pm$  0.028), and sac-spawning (0.440  $\pm$  0.030)  
628 copepods. Conversely, the CWM values of myelinated (0.413  $\pm$  0.016) species in Region 2  
629 were the lowest across all four regions.

630 Region 3 was located poleward to the previous two regions and covered the North Atlantic  
631 Ocean, the North Pacific Ocean and the waters located between the Polar Front and the  
632 Antarctic Circumpolar Current. The CWM body size (2.691  $\pm$  0.342 mm), the CWM values  
633 of myelinated (0.514  $\pm$  0.028) and omnivorous (0.279  $\pm$  0.021) species were higher there than  
634 in Regions 1 and 2. In contrast, the CWM values of sac-spawners (0.368  $\pm$  0.041), carnivores  
635 (0.266  $\pm$  0.026), and ambush feeders (0.132  $\pm$  0.027) was lower.

636 Region 4 mainly corresponded to the Southern Ocean (i.e., grid cells south of the Antarctic  
637 Polar Front, Fig. 4a). Region 4 displayed the highest CWM body size (3.035  $\pm$  0.321 mm),  
638 higher CWM values of myelinated (0.541  $\pm$  0.018), omnivorous (0.278  $\pm$  0.013), and  
639 detritivorous (0.176  $\pm$  0.030) species, and the lowest CWM values of sac-spawners (0.351  $\pm$   
640 0.035). The CWM values of current-feeding (0.522  $\pm$  0.015) and cruise-feeding (0.218  $\pm$   
641 0.009) species was higher than those of ambush-feeding (0.120  $\pm$  0.016).

642

## 643 **4. Discussion**

### 644 4.1. Towards meaningful global zooplankton FGs in marine ecology

645 Here, we identified eleven copepod FGs based on combinations of species-level functional  
646 traits. Nine of these eleven FGs had also been found, or were nested within larger groups, in  
647 previous studies based on regional species pools (Pomerleau et al., 2015; Benedetti,  
648 Gasparini, & Ayata, 2016; Benedetti, Vogt, et al., 2018; Becker et al., 2021; summarized in  
649 Table 1), which suggests that most of the functions performed by copepods on a global scale  
650 should also be expressed at regional scales.

651

652 **Table 1:** Table summarizing the overlap between the copepod functional groups (FGs) defined in the  
 653 present study and those found in previous studies based on species composition and functional trait  
 654 composition.

| This study | Main clade                            | Main traits                                                          | Pomerleau et al. (2015) - North Pacific Ocean                    | Benedetti et al. (2016) - Mediterranean Sea                     | Benedetti et al. (2018) - Mediterranean Sea                           | Becker et al. (2021) - South Atlantic Ocean                                                      |
|------------|---------------------------------------|----------------------------------------------------------------------|------------------------------------------------------------------|-----------------------------------------------------------------|-----------------------------------------------------------------------|--------------------------------------------------------------------------------------------------|
| FG1        | Clausocalanus                         | Small myelinated cruise-feeding omnivores-herbivores                 | Small current- and cruise-feeding omnivores-herbivores (Group 6) | Small cruise-feeding omnivores-herbivores (subset of Group 6)   | Small cruise-feeding omnivores-herbivores (Group 7)                   | Small and large myelinated cruise- and current-feeding omnivores-herbivores (subset of Group B)  |
| FG2        | Oncaeidae                             | Small non myelinated cruise-feeding detritivores                     | No equivalent                                                    | Small cruise-feeding omnivores-detritivores (subset of Group 6) | Small sac-spawning detritivores (subset of Group 5)                   | Small amyelinated ambush- or cruise-feeding carnivores or detritivores (small subset of Group D) |
| FG3        | Spinocalanus, Scaphocalanus, Metridia | Medium-sized myelinated mixed-feeding or cruise-feeding detritivores | No equivalent                                                    | Small cruise-feeding omnivores-detritivores (subset of Group 6) | Small sac-spawning detritivores (small subset of Group 5)             | No equivalent                                                                                    |
| FG4        | Corycaeidae                           | Small amyelinated ambush-feeding carnivores                          | No equivalent                                                    | Small ambush-feeding carnivores (Group 2)                       | Small ambush-feeding carnivores (Group 2)                             | Small amyelinated ambush- or cruise-feeding carnivores or detritivores (small subset of Group D) |
| FG5        | Sapphirinidae, Euchaetidae            | Large current- or cruise-feeding carnivores                          | No equivalent                                                    | Large cruise-feeding carnivores (Group 1)                       | Large cruise- or current-feeding feeding carnivores (Group 1)         | Small and large myelinated cruise- and current-feeding omnivores-herbivores (subset of Group B)  |
| FG6        | Calanus, Eucalanus                    | Very large myelinated current-feeding omnivores-herbivores           | No equivalent                                                    | No equivalent                                                   | No equivalent                                                         | No equivalent                                                                                    |
| FG7        | Calanus, Paracalanus, Calocalanus     | Medium-sized myelinated current-feeding omnivores-herbivores         | Small and large current-feeding omnivores-herbivores (Group 5c)  | Small and large current-feeding omnivores-herbivores (Group 4)  | Small and large current-feeding omnivores-herbivores (Groups 3 and 4) | Large myelinated current-feeding omnivores-herbivores (subset of Group C)                        |
| FG8        | Candacia, Haloptilus, Heterorhabdus   | Medium-sized amyelinated ambush- or current-feeding carnivores       | No equivalent                                                    | Large cruise-feeding carnivores (Group 1)                       | Large cruise- or current-feeding feeding carnivores (Group 1)         | No equivalent                                                                                    |
| FG9        | Pleuromamma, Gaetanus,                | Medium-sized amyelinated                                             | No equivalent                                                    | Small and large current-feeding                                 | Small and large current-feeding                                       | No equivalent                                                                                    |



|      | Labidocera           | current-feeding omnivores                  |                                                    | omnivores-herbivores (subset of Group 4) | omnivores-herbivores (small subset of Group 4)          |                                                                |
|------|----------------------|--------------------------------------------|----------------------------------------------------|------------------------------------------|---------------------------------------------------------|----------------------------------------------------------------|
| FG10 | Oithonidae           | Small amyelinated ambush-feeding omnivores | No equivalent                                      | Small ambush-feeding omnivores (Group 5) | Small ambush-feeding omnivores (Group 6)                | Small amyelinated mixed- or ambush-feeding omnivores (Group A) |
| FG11 | Acartia, Centropages | Small amyelinated mixed-feeding omnivores  | Small ambush-feeding omnivores (subset of Group 4) | Small mixed-feeding omnivores (Group 3)  | Small mixed-feeding omnivores (small subset of Group 4) | Small amyelinated mixed- or ambush-feeding omnivores (Group A) |

655

656

657 The four FGs defined by Becker et al., (2021) based on a series of cruises in the South  
 658 Atlantic Ocean were quite broad and often functionally heterogeneous (i.e., large carnivorous  
 659 copepods mixed with smaller current-feeding omnivorous-herbivorous ones, or small cruise-  
 660 feeding particles feeders mixed with small ambush-feeding carnivores). As a result, our FGs  
 661 are often nested within, or scattered across, the groups defined by Becker et al. (2021).

662 Only the present FG3 and FG6 have no true counterparts in previous studies. These two  
 663 groups find their most suitable habitats towards the poles (Fig. 3) whose zooplankton  
 664 communities were not covered by the regional studies mentioned. The copepods of FG3  
 665 (*Spinocalanus* spp., *Metridia* spp., or *Scaphocalanus* spp.) are known to mainly inhabit  
 666 deeper ocean layers where they feed on falling particulate organic matter and zooplankton  
 667 carcasses (Yamaguchi et al., 2002; Sano et al., 2013). Therefore, this group contributes to the  
 668 remineralization of organic matter and marine snow at higher latitudes and/or in colder  
 669 conditions. FG6 comprises the largest current-feeding omnivorous-herbivorous copepods  
 670 from the Calanidae family (*Eucalanus* spp. and *Calanus* spp.). Such large copepods are not  
 671 present in the warm and oligotrophic conditions of the Mediterranean Sea hence their absence  
 672 in Benedetti, Gasparini, & Ayata (2016) and Benedetti, Vogt, et al. (2018). FG6 is a key  
 673 group for the biological carbon pump and lipid pump (Jónasdóttir et al., 2015; Visser et al.,  
 674 2017; Steinberg & Landry, 2017; Brun et al., 2019) as it represents large-bodied grazers that  
 675 can actively feed on microphytoplankton, perform relatively strong vertical migrations and  
 676 generate large and fast sinking pellets (Stamieszkin et al., 2015; Ohman & Romagnan 2016;  
 677 Brun et al., 2019). This is confirmed by the position of FG6 in niche space (Fig. 2) as it is  
 678 affiliated to turbulent and seasonally varying conditions with higher nutrient and chlorophyll-

679 a concentrations. The ecological roles and functions ensured by the other nine FGs have  
680 already been detailed and discussed in those previous studies. We support the statements of  
681 these authors and how they described the ecological roles of the copepod FGs. Here, we  
682 found a larger range of FGs compared to previous studies due to three main reasons: (i) we  
683 investigated a global and larger (hundreds of species instead of tens) pool of species, (ii) we  
684 accounted for myelination as an additional trait, and (iii) we retained body size as a  
685 continuous trait, contrary to Benedetti, Gasparini & Ayata (2016) and Benedetti, Vogt et al.  
686 (2018) whom relied on size classes which likely smoothed out important trait variations.

687 Overall, the largest differences in niche space (Fig. 2a, Appendix S14) occurred between two  
688 main sets of FGs: (i) myelinated free-spawning large-bodied, or medium-bodied, current-  
689 feeding herbivores (FG3, 6, 7 and 9), and (ii) amyelinated sac-spawning small-bodied, or  
690 large-bodied, cruise- and ambush-feeding detritivores and carnivores (FG2, 4 and 5). The first  
691 set is associated with conditions of stronger mixing and higher nutrients and chlorophyll-a  
692 concentrations (Fig. 2b). The species constituting these FGs also show larger niche widths,  
693 suggesting they display broader tolerances to monthly variations in environmental conditions.  
694 Therefore, these FGs are found more frequently in high latitude environments, or boundary  
695 current systems, where either seasonality or horizontal and vertical mixing lead to higher  
696 mean annual productivity (Sarmiento & Gruber, 2006; Roy 2018). In contrast, the FGs of the  
697 second set display narrower niches and are associated with conditions typical of the warmer  
698 tropical oligotrophic gyres (weaker water mixing and lower nutrients and chlorophyll-a  
699 concentrations; Fig. 2b). Meanwhile, the groups that are in the center of the niche space (FG1,  
700 8, 10 and 11) are those whose species are very scattered across said space, meaning these FGs  
701 could not be associated to any particular environment at the scale of our study.

702 This continuum of FGs in niche space was also found in functional trait space. Indeed, the  
703 FGs of sets (i) and (ii) were often found on opposite sides of the FAMD dimensions (see  
704 Appendix S12). The global spatial distribution of the FGs and CWM trait values (Figs. 3 and  
705 4) further support the statements above: larger myelinated free-spawning and active feeding  
706 copepods occur more frequently near the poles, whereas smaller amyelinated sac-spawning  
707 and passive feeding copepods tend to occur in tropical oligotrophic gyres. Similar continuums  
708 of copepod functional traits and environmental niches were found at smaller scales  
709 (references in Table 1) or globally (Brun et al., 2016).

710

711 Towards meaningful zooplankton FGs in marine ecosystem models

712 Our combination of analyses supports the view that planktonic copepods display a continuum  
713 of functional traits with a strong latitudinal gradient (Fig. 3 and 4; Appendix S9), driven by  
714 global gradients in abiotic conditions. Larger and myelinated active feeders present higher  
715 metabolic rates as well as higher feeding, excretion and mortality rates (Kiørboe 2011a; Lenz  
716 2012; Litchman et al., 2013; Kiørboe & Hirst, 2014; Stamieszkin et al., 2015; van Someren  
717 Gréve, Almeda, & Kiørboe, 2017; Brun et al., 2019). A similar continuum can occur within a  
718 trophic group: larger current-feeding phytoplankton grazers (e.g., FG6 and 7) can feed on  
719 larger cells than their smaller congeners (FG1 and 11; Hansen et al., 1994), or larger active-  
720 feeding predators (FG5 and 8) can exert a top-down control on smaller ambush-feeding  
721 predators (FG4) or smaller zooplankton in general. Consequently, such a continuum should be  
722 explicitly represented in regional and global marine ecosystem models (e.g. similar to Serra-  
723 Pompei et al., 2020), which too often rely on a few size classes only (Le Quéré et al., 2005;  
724 Sailley et al., 2013). However, with a few exceptions (Henson et al., 2021), global marine  
725 ecosystem models do not yet routinely include >10 zooplankton FGs due to computational  
726 constraints. Since these models aim to represent biomass dynamics (in units of carbon)  
727 between food web components and their interactions with climate, their improvement should  
728 first focus on including copepod FGs that contribute the most to community biomass, and  
729 biogeochemical function (Le Quéré et al. 2005).

730 To try to rank the present FGs based on their contribution to total copepod community  
731 abundance in the upper layers of the global ocean, we implemented a preliminary synthesis of  
732 copepod abundance observations from various large-scale data sources (see Appendix S16).  
733 When examining the relative contribution of the eleven FGs to mean annual community  
734 abundance (Fig. S16b), three FGs emerge as the most abundant regardless of latitude and  
735 sampling gears: FG10 (Oithonids; small ambush-feeding omnivores), FG2 (Oncaeids; small  
736 cruise-feeding detritivores) and FG1 (*Clausocalanus* spp.; small cruise-feeding omnivores-  
737 herbivores). FG11 (*Acartia* spp. and *Centropages* spp.; small omnivorous mixed-feeders) also  
738 contributes substantially to total copepod abundance in the northern Atlantic and Pacific  
739 Oceans. Consequently, we encourage modelers to represent those three FGs more explicitly in  
740 future global ecosystem models. Some additional groups show a higher relative abundance on  
741 a regional scale, like FG4 in the tropics, or FG7 and FG9 in the Southern Ocean, which may  
742 make these groups important for regional ecosystem modeling efforts. The remaining FGs  
743 (FG3, 5, 6 and 8) display very low contributions to mean annual abundance, regardless of the  
744 latitude and the sampling gear. Such groups might be of a lower priority for improving the  
745 representation of zooplankton in marine ecosystem models. Nonetheless, these four FGs are

746 characterized by larger body sizes than FG1, 2 or 10 (Table S4.2) so their actual contribution  
747 to biomass production could be substantially higher, especially FG6 which gathers the largest  
748 filter-feeding Calanidae that are several millimeters longer than the species in FG1, FG2 or  
749 FG10. Future work will help model the contribution of the present copepod FGs to  
750 zooplankton biomass, and to clarify their relative priorities for inclusion in marine ecosystem  
751 models.

752

#### 753 4.2. Why do copepod functional traits show contrasting biogeographic patterns in the ocean?

754 We defined four main ocean regions according to their similarity in community-level  
755 functional trait expression (Fig. 4a, Appendices S9 and S15). The first-order pattern  
756 corresponded to the separation between those regions poleward to  $\sim 45^\circ$  latitude (regions 3  
757 and 4) and those equatorward to  $\sim 45^\circ$  latitude (regions 1 and 2; Appendix S10). Then, two  
758 key second-order patterns emerged: the regions south of the Antarctic Polar Front (region 4)  
759 showed a community trait composition distinct than those of the other high latitudes (e.g., the  
760 Arctic Ocean or the North Pacific Ocean), and the oligotrophic tropical gyres (region 2) were  
761 separated from the boundary upwelling and the equatorial current systems (region 1). The  
762 largest dissimilarity in community trait expression was found between regions 2 and 4 (Fig.  
763 4b-m) and was driven by differences in CWM body size, myelination, carnivory and ambush-  
764 feeding vs. current-feeding (Appendices S9, S10 and S15). These trait patterns emerge from  
765 environment-based distribution models, so they reflect combinations of environmental  
766 conditions, but they also reflect biological processes that lead to the selection of trade-offs  
767 between traits through abiotic and/or biotic filtering. In other words, certain trait combinations  
768 are more competitive than others under varying conditions of temperature or food availability  
769 because of physiological constraints or because they lead to lower mortality rates (Litchman  
770 et al., 2013; Barton et al., 2013; van Someren Gréve et al., 2017; McGinty et al., 2021).

771 Median copepod body size decreased from the poles to the equator with a slight increase in  
772 upwelling systems. Such a pattern has been documented by other studies and is primarily  
773 driven by the strong negative relationship between the body size of marine ectotherms and  
774 temperature, according to Bergmann's rule (Brun et al., 2016; McGinty et al., 2018; Evans et  
775 al., 2020; Brandão et al., 2021; Campbell et al., 2021). The precise processes underlying  
776 Bergmann's rule remain debated, but it is likely that warmer temperatures (or a factor  
777 confounded with temperature) decrease growth efficiency and/or promote the maturation of  
778 adults at smaller body sizes (Atkinson 1994; Isla et al., 2008). Dissolved oxygen  
779 concentration could also limit maximal body size in marine ectotherms under the "oxygen

780 hypothesis” (Audzijonyte et al., 2019), but so far temperature outperformed oxygen in  
781 explaining variations in body size structure (Campbell et al., 2021).

782 Bergmann’s rule occurs at the intraspecific level and at the interspecific level, meaning that  
783 warming-induced decreases in median body size can emerge if smaller clades replace larger  
784 ones along a latitudinal gradient. Such a turnover in size classes has been observed as well  
785 (Evans et al., 2020; Brandão et al., 2021) and is supported by our SDM projections. Indeed,  
786 functional traits that represent shifts in clade composition (i.e., those that show strong  
787 taxonomic clustering) such as myelination, spawning strategy, carnivory or feeding modes  
788 displayed latitudinal gradients that are positively, or negatively, collinear with the body size  
789 gradient (Appendices S9 and S10). The latitudinal patterns of these functional traits likely  
790 result from changes in food availability, quality, and predation pressure that are known to  
791 vary greatly from polar regions to tropical gyres (Brun et al., 2016; Horne et al., 2016; van  
792 Someren Gréve et al., 2017; Roy, 2018).

793 Lipid-rich myelin sheaths enable a faster conduction of nerve responses. This promotes faster  
794 reaction times and thus more efficient feeding or escape behaviors (Lenz, 2012). Myelin  
795 sheaths are cholesterol-rich so they require larger metabolic investments of dietary lipids  
796 (Lenz, 2012), which helps explain why copepod communities show larger proportion of small  
797 amyelinated taxa in tropical gyres where smaller lipid-poor phytoplankton dominate (Roy,  
798 2018). Therefore, it is not surprising that the proportions of myelinated species follow the  
799 same spatial pattern as body size and current-feeding (Fig. 4b,c,j,m) and peak in productive  
800 environments characterized by larger and lipid-rich plankton (Roy 2018).

801 Similarly, sac-spawning is a more energy-conservative spawning strategy as it reduces egg-  
802 mortality at the cost of fecundity and hatching speed. The increased proportions of sac-  
803 spawners in tropical gyres (Fig. 4d) could reflect an adaptation to limited food availability  
804 (Kiørboe & Sabatini, 1994; Barton et al., 2013) and higher rates of carnivory (Fig. 4e;  
805 Woodd-Walker et al., 2002) and egg cannibalism among copepods (Ohman & Hirche, 2001;  
806 Segers & Taborsky, 2011). Furthermore, ambush-feeding is a passive feeding mode that  
807 lowers predation risk and energy costs compared to current- and cruise-feeding, but at the  
808 expense of feeding efficiency (Kiørboe, 2011a; van Someren Gréve et al., 2017).  
809 Consequently, the increased proportion of ambush-feeders in region 2 (Fig. 4i) should also  
810 result from trade-offs in functional traits expression driven by abiotic and biotic filtering  
811 (Litchman et al., 2013), as oligotrophic gyres seem to promote food-webs with increased  
812 carnivorous predation (Fig. 4e) and resource competition (Wood-Walker et al., 2002; Prowe,  
813 Visser, Andersen, Chiba, & Kiørboe, 2019).

814 However, our approach is based on presence data and habitat suitability indices rather than  
815 abundances, which likely underestimates the contribution of very abundant ambush-feeding  
816 species like *Oithona similis* at high latitudes (Gallienne & Robins, 2001; Pinkerton et al.,  
817 2010; Prowe, Visser, Andersen, Chiba, & Kiørboe, 2019). As a result, we probably  
818 underestimate the proportion of ambush-feeders in regions such as the Southern Ocean  
819 compared to Prowe et al. (2018), although these authors discarded other ambush-feeding  
820 copepods such as the Corycaeidae (Benedetti et al., 2016; Brun et al., 2017). Together, these  
821 elements support the fact that our modelled zooplankton functional traits patterns emerge  
822 from interactions between environmental conditions and the relative fitness (i.e., trade-offs)  
823 resulting from different trait combinations.

824 The climatological conditions used to train the SDMs are influenced by large scale oceanic  
825 currents as highlighted by our regionalization analysis (Fig. 4). We found the boundaries of  
826 the four main regions to overlap with the trajectories of well-known boundary currents as well  
827 as equatorial counter currents and fronts. Unfortunately, we cannot disentangle the effects of  
828 dispersal by currents on the observed community trait expression (and their modelled spatial  
829 patterns) from the effects of gradients in temperature and/or productivity, which select species  
830 based on their physiological requirements. Although ocean basin connectivity is rather high at  
831 the scale of our study (Jönsson & Watson, 2016), dispersal by marine currents and mesoscale  
832 processes are known to impact plankton community structure (Richter et al., 2020; Sommeria-  
833 Klein et al., 2021). For instance, the Antarctic Polar Front seems to be the main delimiter  
834 between regions 3 and 4, which coincides with the view that it imposes a strong physical  
835 barrier on passively drifting zooplankton (Murphy et al., 2021). Yet, recent evidence showed  
836 that many epipelagic plankton can cross Southern Ocean fronts thanks to the very dynamic  
837 meandering eddies (Murphy et al., 2021), which could explain the deviations of the region 4  
838 boundaries from the Antarctic Polar Front. Therefore, the gradient in community trait  
839 expression separating regions 3 and 4 may also stem from the latitudinal gradient in  
840 temperature and biogeochemical conditions that select species and their traits based on  
841 physiological and metabolic constraints. Similarly, the gradients in CWM traits (i.e., the  
842 poleward succession of regions 2, 1 and 3) modelled in the North Pacific and North Atlantic  
843 Oceans could be driven by the temperature gradient or the presence of western boundary  
844 currents (e.g., the Gulf Stream and the North Pacific Current) which carry southern warm-  
845 water communities eastward while they are getting mixed with northern cold-water  
846 communities. Such processes could explain why the CWM trait distribution of region 1 lies in  
847 between those of regions 2 and 3 (Fig. 4). This uncertainty calls for more studies combining

848 distribution models with dispersal rates and limitations (D'Amen et al., 2018; Shipley et al.,  
849 2021) to study the link between zooplankton functional traits and the “seascape” (Sommeria-  
850 Klein et al., 2021; Richter et al., 2020).

851

#### 852 4.3. Caveats and future directions

853 Our results are sensitive to the three main steps of our framework: (i) the way the species  
854 were positioned in a functional space and how the FGs were defined from the latter, (ii) the  
855 quantity and quality of the functional trait data considered, and (iii) the SDMs chosen to  
856 generate the CWM traits values. We carefully investigated the sensitivity of our FGs  
857 definition to alternative choices made in our clustering approach (Appendix S4). Most of the  
858 comparable studies working with functional trait spaces rely on a Gower distance matrix and  
859 a principal coordinate analysis (PCoA; Legendre & Legendre, 2012) to ordinate taxa as a  
860 function of their trait combinations (see the synthesis by Mouillot et al., 2021). Here, we  
861 relied on an alternative dimensionality reduction analysis (i.e., the FAMD) to avoid negative  
862 eigenvalues (i.e., imaginary dimensions) and the relatively low levels of explained variance  
863 that are often inherent to the use of a PCoA (Legendre & Legendre, 2012; Mouillot et al.,  
864 2021). We assessed how using this alternative dimension reduction analysis affected the  
865 quality of the functional trait space by computing the AUC criterion recommended by  
866 Mouillot et al. (2021). We found an AUC value of 0.81, which is substantially higher than the  
867 recommended 0.7 threshold and indicates a “high quality trait space” according to these  
868 authors. In addition, the first four PCs of our FAMD explained nearly 80% of the variance in  
869 species traits, which reinforces our confidence in the quality of our functional trait space.

870 Beyond the dimensionality reduction step, the choice of the distance matrix and aggregation  
871 link could have been determining factors in drawing the functional dendrogram and thus  
872 defining the FGs (Fig. 1). We evaluated the similarity between the functional dendrograms  
873 emerging from alternative clustering approaches and found that they were all highly  
874 positively correlated (mean Baker’s Gamma correlation coefficient was  $0.75 \pm 0.12$ ;  
875 Appendix S4). This indicates that all dendrograms displayed very similar structure and  
876 explains how these dendrograms would have led to similar FGs composition. Ultimately, the  
877 approach that combined the FAMD, an Euclidean distance matrix, and Ward’s aggregation  
878 linkage was chosen as our standard approach, since it provided ecologically meaningful FGs  
879 (i.e., groups that are neither too large and functionally heterogeneous nor too numerous and  
880 functionally redundant).

881 The quantity and the quality of the species-level functional trait information considered for  
882 our study largely determined the FGs and their ecological meaning. The traits chosen for this  
883 study only cover a fraction of the traits mentioned in the literature (Litchman et al., 2013;  
884 Brun et al., 2017; Appendix S3). Therefore, our study is likely underestimating the true  
885 diversity of copepod functions and FGs present in the ocean. However, it could also be that  
886 the present functional groups are quite representative of natural copepod communities and  
887 that adding further traits would only subdivide those FGs into smaller and functionally  
888 homogeneous ones. The trait compilation of Brun et al. (2017) included the following  
889 additional functional traits: growth rate, clearance rate, ingestion rate, egg diameter and  
890 production, or the production of resting eggs and diapausing stages throughout the life cycle.  
891 Yet, the availability and the coverage of those traits remained too poor for the wide pool of  
892 species studied here (Appendix S3), reflecting the historic measurement biases that largely  
893 focused on larger Calanoida species such as *Calanus* spp. Since a broad range of metabolic  
894 and physiological traits scale allometrically with body size (Kiørboe & Hirst, 2014),  
895 additional traits could be inferred based on body size measurements and phylogenetic  
896 distances (Molina-Veigas et al., 2018). It also implies that the present FGs characterized by  
897 larger body sizes (e.g., FG5 and 6) should display larger metabolic rates. Further lab-based  
898 and observation-based are needed to uncover the functional trait expression for a larger range  
899 of copepod species and families.

900 Differences between model projections are the main source of uncertainty in species  
901 community composition and diversity under a SDMs ensemble approach (Benedetti,  
902 Guilhaumon, Adloff, & Ayata, 2018; Diniz-Filho et al., 2009). We found some regional  
903 differences between the mean annual HSI projections of the SDMs. When considering all  
904 copepod species together, the GLM estimated higher mean HSI than the two other model  
905 types for the Southern Ocean (Appendix S8). Such variability could arise from how the  
906 various SDMs cope with limited predictors and species occurrence availability in winter  
907 conditions at the very high latitudes. Indeed, the copepod occurrence data (Appendix S1) and  
908 the climatological satellite observations (e.g., PAR and logChl) have poor coverage at  
909 latitudes  $>60^\circ$  in winter. The sampling effort in the Southern Ocean is slightly lower than the  
910 global average between April and October and is extremely low between May and September  
911 (Appendix S1), and satellite-based PAR and chlorophyll-a measurements are not available for  
912 winter months due to the low light levels at high latitudes. Therefore, our mean annual  
913 projections for the polar oceans are likely more representative of summer conditions. Most  
914 GLMs and GAMs included one or both of these satellite-based climatologies as predictors



915 (Appendix S6). Yet only GLMs showed these relatively high HSI levels in the Southern  
916 Ocean. Plus, SST was found to be the most influential predictor in both SDMs types  
917 (Appendix S6). This implies that this discrepancy between GLMs and GAMs was not driven  
918 by predictor selection but rather by how the responses of the species to SST and logChla/PAR  
919 gradients were captured by those two types of models (Merow et al., 2014). Here, the less  
920 complex response curves of the GLMs lead to higher average HSI at very cold temperatures  
921 compared to GAMs. The HSI patterns obtained from the GAM and ANN were closer to the  
922 latitudinal diversity gradients that were previously observed and modelled for marine  
923 ectotherms, which seldom show increases in richness or habitat suitability towards the poles  
924 (Tittensor et al., 2010; Benedetti et al., 2021). Consequently, we have more confidence in the  
925 GAM-based and ANN-based annual HSI estimates than in the GLM-based ones.

926 Interestingly, inter-SDMs variability was much lower when looking at CWM traits  
927 projections rather than HSI patterns (Appendix S8). All three SDMs lead to very similar  
928 spatial patterns in CWM traits and the amplitude of these CWM values differed only slightly.  
929 The regions displaying higher CWM traits variability depended on the trait considered, and  
930 variability remained quite low overall (but see Appendix S8). Therefore, the present CWM  
931 traits patterns display relatively low uncertainty compared to the HSI patterns. The fact that  
932 CWM body size and CWM myelination show very similar spatial patterns and ranges to the  
933 respective estimates of Brun et al. (2016) gives us further confidence in our approach and  
934 spatial projections.

935 To conclude, we recommend the inclusion of multiple functional groups of copepods in  
936 marine ecosystem models, based on our functional dendrogram (Fig. 1), with a level of  
937 complexity of zooplankton representation that should be modulated by the scientific question,  
938 the FGs dominating community biomass at the scale of the study region(s), the traits of  
939 interest, and computing efficiency constraints. Ideally, future global marine ecosystems, that  
940 cannot efficiently include 10 zooplankton groups, will include a few (3-4) FGs that cover the  
941 main gradients observed in trait space (Fig. 1; Appendix S12), niche space (Fig. 2),  
942 geographical space (Figs. 3, 4; Appendices S9, S10) and that represent important fractions of  
943 biomass (Appendix S16). This would divide copepods into a few but ecologically meaningful  
944 groups with clearly distinct ecological niches and also functional trait characteristics. For  
945 other ecological applications or to represent food-web interactions across trophic levels (Ward  
946 et al., 2012; Serra-Pompei et al., 2020), these groups could be split into further FGs with  
947 specific characteristics (e.g., size classes, high lipid content, grazing and mortality rates etc.).  
948 To achieve this, future studies are required to improve the coverage of functional traits data

949 towards more taxonomic groups and more quantitative traits (Appendix S3). Ongoing  
950 compilations of zooplankton groups biomass data will also help rank the importance of the  
951 present FGs worldwide and across regions. Ultimately, the present results and future data  
952 compilations will help us study global patterns of zooplankton functional diversity (Mouillot  
953 et al., 2013), which may link more closely to ecosystem function and service provision than  
954 taxonomic diversity. Marine ecosystems will experience increasingly stressful conditions in  
955 the next century due to anthropogenic climate change (IPCC, 2021). This will strongly  
956 restructure zooplankton community richness and composition as species migrate poleward to  
957 track suitable habitats (Benedetti et al., 2021). How these changes will impact functional trait  
958 expression and functional diversity at the community-level remains too poorly understood.  
959 The present study is thus a key step towards our understanding of how future climate change  
960 will reshape the expression of marine functional diversity worldwide.

961

#### 962 *Data Availability Statement*

963 The copepod species occurrences data used to train the species distribution models are  
964 publicly available on Zenodo (10.5281/zenodo.5101349). The newly implemented species-  
965 level functional trait table is available as Table S2 and will be made available through an open  
966 access repository upon publication of our study. Any computer code used to generate the  
967 results of the study are freely available upon request to the authors and all R codes are  
968 currently stored on the GitHub account of J.W. (<https://github.com/jonas-wydlar>).

969

#### 970 *References*

971 Aiello-Lammens, M. E., Boria, R. A., Radosavljevic, A., Vilela, B., & Anderson, R. P. (2015).  
972 sptthin: an R package for spatial thinning of species occurrence records for use in ecological niche  
973 models. *Ecography*, 38(5), 541–545.

974 Atkinson, D. (1994). Temperature and Organism Size—A Biological Law for Ectotherms? In  
975 M. Begon & A. H. Fitter (Eds.), *Advances in Ecological Research* (Vol. 25, pp. 1-58): Academic  
976 Press.

977 Audigier, V., Husson, F., & Josse, J. (2016). A principal component method to impute missing  
978 values for mixed data. *Advances in Data Analysis and Classification*, 10(1), 5–26.

979 Audzijonyte, A., Barneche, D. R., Baudron, A. R., Belmaker, J., Clark, T. D., Marshall, C. T.,  
980 . . . van Rijn, I. (2019). Is oxygen limitation in warming waters a valid mechanism to explain  
981 decreased body sizes in aquatic ectotherms? *Global Ecology and Biogeography*, 28(2), 64-77.  
982 doi:10.1111/geb.12847

- 983 Baker, F. B. (1974). Stability of two hierarchical grouping techniques case i: sensitivity to data  
984 errors. *Journal of the American Statistical Association*, 69(346), 440–445.
- 985 Barnett, A. J., Finlay, K., & Beisner, B. E. (2007). Functional diversity of crustacean  
986 zooplankton communities: towards a trait-based classification. *Freshwater Biology*, 52(5), 796–813.
- 987 Barton, A. D., Pershing, A. J., Litchman, E., Record, N. R., Edwards, K. F., Finkel, Z. V., . . .  
988 Ward, B. A. (2013). The biogeography of marine plankton traits. *Ecology Letters*, 16(4), 522–534.  
989 doi: 10.1111/ele.12063
- 990 Beaugrand, G., Edwards, M., & Legendre, L. (2010). Marine biodiversity, ecosystem  
991 functioning, and carbon cycles. *Proceedings of the National Academy of Sciences*, 107(22), 10120-  
992 10124. doi:10.1073/pnas.0913855107
- 993 Becker, É. C., Mazzocchi, M. G., de Macedo-Soares, L. C. P., Costa Brandão, M., &  
994 Santarosa Freire, A. (2021). Latitudinal gradient of copepod functional diversity in the South Atlantic  
995 Ocean. *Progress in Oceanography*, 199, 102710. doi:<https://doi.org/10.1016/j.pocean.2021.102710>
- 996 Benedetti, F., Gasparini, S., & Ayata, S.-D. (2016). Identifying copepod functional groups  
997 from species functional traits. *Journal of Plankton Research*, 38(1), 159-166.  
998 doi:10.1093/plankt/fbv096
- 999 Benedetti, F., Guilhaumon, F., Adloff, F., & Ayata, S.-D. (2018). Investigating uncertainties in  
1000 zooplankton composition shifts under climate change scenarios in the Mediterranean Sea. *Ecography*,  
1001 41(2), 345–360. doi: 10.1111/ecog.02434
- 1002 Benedetti, F., Vogt, M., Righetti, D., Guilhaumon, F., & Ayata, S.-D. (2018). Do functional  
1003 groups of planktonic copepods differ in their ecological niches? *Journal of Biogeography*, 45(3), 604–  
1004 616. doi: 10.1111/jbi.13166
- 1005 Benedetti, F., Vogt, M., Elizondo, U. H., Righetti, D., Zimmermann, N. E., & Gruber, N.  
1006 (2021). Major restructuring of marine plankton assemblages under global warming. *Nature*  
1007 *Communications*, 12(1), 5226. doi:10.1038/s41467-021-25385-x
- 1008 Boyer, T.P., J. I. Antonov, O. K. Baranova, C. Coleman, H. E. Garcia, A. Grodsky, D. R.  
1009 Johnson, R. A. Locarnini, A. V. Mishonov, T.D. O'Brien, C.R. Paver, J.R. Reagan, D. Seidov, I. V.  
1010 Smolyar, and M. M. Zweng, 2013: World Ocean Database 2013, NOAA Atlas NESDIS 72, S.  
1011 Levitus, Ed., A. Mishonov, Technical Ed.; Silver Spring, MD, 209 pp.,  
1012 <http://doi.org/10.7289/V5NZ85MT>
- 1013 Bron, J. E., Frisch, D., Goetze, E., Johnson, S. C., Lee, C. E., & Wyngaard, G. A. (2011).  
1014 Observing copepods through a genomic lens. *Frontiers in Zoology*, 8(1), 1–15.  
1015 <https://doi.org/10.1186/1742-9994-8-22>
- 1016 Brun, P., Payne, M. R., & Kiørboe, T. (2016). Trait biogeography of marine copepods—an  
1017 analysis across scales. *Ecology Letters*, 19(12), 1403–1413. doi: 10.1111/ele.12688
- 1018 Brun, P., Payne, M. R., & Kiørboe, T. (2017). A trait database for marine copepods. *Earth*  
1019 *System Science Data*, 9(1), 99–113. doi:10.5194/essd-2016-30

- 1020 Brun, P., Stamieszkin, K., Visser, A. W., Licandro, P., Payne, M. R., & Kiørboe, T. (2019).  
1021 Climate change has altered zooplankton-fuelled carbon export in the North Atlantic. *Nature Ecology*  
1022 *& Evolution*, 3(3), 416–423. <https://doi.org/10.1038/s41559-018-0780-3>
- 1023 Campbell, M. D., Schoeman, D. S., Venables, W., Abu-Alhaila, R., Batten, S. D., Chiba, S., . .  
1024 . Richardson, A. J. (2021). Testing Bergmann's rule in marine copepods. *Ecography*, 44(9), 1283-  
1025 1295. doi:<https://doi.org/10.1111/ecog.05545>
- 1026 Cormen, T. H., Leiserson, C. E., Rivest, R. L., & Stein, C. (2009). Introduction to algorithms.  
1027 *MIT and McGraw*.
- 1028 D'Amen, M., Mod, H. K., Gotelli, N. J., & Guisan, A. (2018). Disentangling biotic  
1029 interactions, environmental filters, and dispersal limitation as drivers of species co-occurrence.  
1030 *Ecography*, 41(8), 1233-1244. doi:<https://doi.org/10.1111/ecog.03148>
- 1031 Diniz-Filho, J. A. F., Mauricio Bini, L., Fernando Rangel, T., Loyola, R. D., Hof, C., Nogués-  
1032 Bravo, D., & Araújo, M. B. (2009). Partitioning and mapping uncertainties in ensembles of forecasts  
1033 of species turnover under climate change. *Ecography*, 32(6), 897–906. doi: 10.1111/j.1600-  
1034 0587.2009.06196.x
- 1035 Dormann, C. F., Elith, J., Bacher, S., Buchmann, C., Carl, G., Carré, G., . . . others (2013).  
1036 Collinearity: a review of methods to deal with it and a simulation study evaluating their performance.  
1037 *Ecography*, 36(1), 27–46. doi: 10.1111/j.1600-0587.2012.07348.x
- 1038 Flynn, K. J., St John, M., Raven, J. A., Skibinski, D. O. F., Allen, J. I., Mitra, A., & Hofmann,  
1039 E. E. (2015). Acclimation, adaptation, traits and trade-offs in plankton functional type models:  
1040 reconciling terminology for biology and modelling. *Journal of Plankton Research*, 37(4), 683-691.  
1041 doi:10.1093/plankt/fbv036
- 1042 Gallienne, C., & Robins, D. (2001). Is *Oithona* the most important copepod in the world's  
1043 oceans? *Journal of Plankton Research*, 23(12), 1421–1432. <https://doi.org/10.1093/plankt/23.12.1421>
- 1044 Guisan, A., Thuiller, W., & Zimmermann, N. E. (2017). Habitat suitability and distribution  
1045 models: with applications in R. Cambridge University Press.
- 1046 Hansen, B., Bjornsen, P. K., & Hansen, P. J. (1994). The size ratio between planktonic  
1047 predators and their prey. *Limnology & Oceanography*, 39(2), 395–403.
- 1048 Hébert, M.-P., Beisner, B. E., & Maranger, R. (2017). Linking zooplankton communities to  
1049 ecosystem functioning: toward an effect-trait framework. *Journal of Plankton Research*, 39(1), 3–12.  
1050 doi:10.1093/plankt/fbw068
- 1051 Henson, S. A., Cael, B. B., Allen, S. R., & Dutkiewicz, S. (2021). Future phytoplankton  
1052 diversity in a changing climate. *Nature Communications*, 12(1), 5372. doi:10.1038/s41467-021-  
1053 25699-w
- 1054 Hijmans, R. J. (2012). Cross-validation of species distribution models: removing spatial  
1055 sorting bias and calibration with a null model. *Ecology*, 93(3), 679-688.  
1056 doi:<https://doi.org/10.1890/11-0826.1>

- 1057 Horne, C. R., Hirst, A. G., Atkinson, D., Neves, A., & Kiørboe, T. (2016). A global synthesis  
1058 of seasonal temperature– size responses in copepods. *Global Ecology and Biogeography*, 25(8), 988–  
1059 999. doi: 10.1111/geb.12460
- 1060 Isla, J. A., Lengfellner, K., & Sommer, U. (2008). Physiological response of the copepod  
1061 *Pseudocalanus* sp. in the Baltic Sea at different thermal scenarios. *Global Change Biology*, 14(4),  
1062 895-906. doi:<https://doi.org/10.1111/j.1365-2486.2008.01531.x>
- 1063 IPCC (2021). Climate Change 2021: The Physical Science Basis. Contribution of Working  
1064 Group I to the Sixth Assessment Report of the Intergovernmental Panel on Climate Change [Masson-  
1065 Delmotte, V., P. Zhai, A. Pirani, S.L. Connors, C. Péan, S. Berger, N. Caud, Y. Chen, L. Goldfarb,  
1066 M.I. Gomis, M. Huang, K. Leitzell, E. Lonnoy, J.B.R. Matthews, T.K. Maycock, T. Waterfield, O.  
1067 Yelekçi, R. Yu, and B. Zhou (eds.)]. Cambridge University Press. In Press.
- 1068 Jónasdóttir, S. H., Visser, A. W., Richardson, K., & Heath, M. R. (2015). Seasonal copepod  
1069 lipid pump promotes carbon sequestration in the deep North Atlantic. *Proceedings of the National*  
1070 *Academy of Sciences*, 112(39), 12122-12126. doi:10.1073/pnas.1512110112
- 1071 Jönsson, B. F., & Watson, J. R. (2016). The timescales of global surface-ocean connectivity.  
1072 *Nature Communications*, 7, 11239. doi:10.1038/ncomms11239
- 1073 Kenitz, K. M., Visser, A. W., Mariani, P., & Andersen, K. H. (2017). Seasonal succession in  
1074 zooplankton feeding traits reveals trophic trait coupling. *Limnology & Oceanography*, 62(3), 1184–  
1075 1197.
- 1076 Kiørboe, T. (2011a). What makes pelagic copepods so successful? *Journal of Plankton*  
1077 *Research*, 33(5), 677– 685. doi:10.1093/plankt/fbq159
- 1078 Kiørboe, T. (2011b). How zooplankton feed: mechanisms, traits and trade-offs. *Biological*  
1079 *Reviews*, 86(2), 311– 339. doi: 10.1111/j.1469-185X.2010.00148.x
- 1080 Kiørboe, T., & Hirst, A. G. (2014). Shifts in mass scaling of respiration, feeding, and growth  
1081 rates across life-form transitions in marine pelagic organisms. *The American Naturalist*, 183(4), E118–  
1082 E130.
- 1083 Kiørboe, T., & Sabatini, M. (1994). Reproductive and life cycle strategies in egg-carrying  
1084 cyclopoid and free-spawning calanoid copepods. *Journal of Plankton Research*, 16(10), 1353–1366.
- 1085 Legendre, P., & Legendre, L. (2012). Numerical Ecology. Elsevier.
- 1086 Le Quéré, C., Harrison, S. P., Colin Prentice, I., Buitenhuis, E. T., Aumont, O., Bopp, L., . . .  
1087 others (2005). Ecosystem dynamics based on plankton functional types for global ocean  
1088 biogeochemistry models. *Global Change Biology*, 11(11), 2016–2040. doi: 10.1111/j.1365-  
1089 2486.2005.01004.x
- 1090 Le Quéré, C., Buitenhuis, E. T., Moriarty, R., Alvain, S., Aumont, O., Bopp, L., . . . Vallina,  
1091 S. M. (2016). Role of zooplankton dynamics for Southern Ocean phytoplankton biomass and global  
1092 biogeochemical cycles. *Biogeosciences*, 13(14), 4111-4133. doi:10.5194/bg-13-4111-2016

- 1093 Lenz, P. H. (2012). The biogeography and ecology of myelin in marine copepods. *Journal of*  
1094 *Plankton Research*, 34(7), 575–589. doi:10.1093/plankt/fbs037
- 1095 Litchman, E., Ohman, M. D., & Kiørboe, T. (2013). Trait-based approaches to zooplankton  
1096 communities. *Journal of Plankton Research*, 35(3), 473–484. doi:10.1093/plankt/fbt019
- 1097 Longhurst, A. R. (2010). *Ecological geography of the sea*. Elsevier.
- 1098 McGinty, N., Barton, A. D., Record, N. R., Finkel, Z. V., & Irwin, A. J. (2018). Traits  
1099 structure copepod niches in the North Atlantic and Southern Ocean. *Marine Ecology Progress Series*,  
1100 601, 109-126. <https://doi.org/10.3354/meps12660>
- 1101 McGinty, N., Barton, A. D., Record, N. R., Finkel, Z. V., Johns, D. G., Stock, C. A., & Irwin,  
1102 A. J. (2021). Anthropogenic climate change impacts on copepod trait biogeography. *Global Change*  
1103 *Biology*, 27(7), 1431-1442. doi:<https://doi.org/10.1111/gcb.15499>
- 1104 Merow, C., Smith, M. J., Edwards Jr, T. C., Guisan, A., McMahon, S. M., Normand, S., . . .  
1105 Elith, J. (2014). What do we gain from simplicity versus complexity in species distribution models?  
1106 *Ecography*, 37(12), 1267–1281. doi: 10.1111/ecog.00845
- 1107 Molina-Venegas, R., Moreno-Saiz, J. C., Castro Parga, I., Davies, T. J., Peres-Neto, P. R., &  
1108 Rodríguez, M. Á. (2018). Assessing among-lineage variability in phylogenetic imputation of  
1109 functional trait datasets. *Ecography*, 41(10), 1740-1749. doi:<https://doi.org/10.1111/ecog.03480>
- 1110 Mouchet, M., Guilhaumon, F., Villéger, S., Mason, N. W., Tomasini, J.-A., & Mouillot, D.  
1111 (2008). Towards a consensus for calculating dendrogram-based functional diversity indices. *Oikos*,  
1112 117(5), 794–800. doi: 10.1111/j.2008.0030-1299.16594.x
- 1113 Mouillot, D., Graham, N. A., Villéger, S., Mason, N. W., & Bellwood, D. R. (2013). A  
1114 functional approach reveals community responses to disturbances. *Trends in Ecology & Evolution*,  
1115 28(3), 167-177. doi: 10.1016/j.tree.2012.10.004
- 1116 Mouillot, D., Loiseau, N., Grenié, M., Algar, A. C., Allegra, M., Cadotte, M. W., . . . Auber,  
1117 A. (2021). The dimensionality and structure of species trait spaces. *Ecology Letters*, 24(9), 1988-2009.  
1118 doi:<https://doi.org/10.1111/ele.13778>
- 1119 Murphy, E. J., Johnston, N. M., Hofmann, E. E., Phillips, R. A., Jackson, J. A., Constable, A.  
1120 J., . . . Xavier, J. C. (2021). Global Connectivity of Southern Ocean Ecosystems. *Frontiers in Ecology*  
1121 *and Evolution*, 9(454). doi:10.3389/fevo.2021.624451
- 1122 Ohman, M. D., & Hirche, H. J. (2001). Density-dependent mortality in an oceanic copepod  
1123 population. *Nature*, 412(6847), 638-641. doi:10.1038/35088068
- 1124 Ohman, M. D., & Romagnan, J.-B. (2016). Nonlinear effects of body size and optical  
1125 attenuation on diel vertical migration by zooplankton. *Limnology & Oceanography*, 61(2), 765–770.  
1126 doi: 10.1002/lno.10251
- 1127 Orsi, A., & Harris, U. (2019). Fronts of the Antarctic circumpolar current–GIS data, ver. 1.
- 1128 Pagès, J. (2004). Analyse factorielle de données mixtes: principe et exemple d'application.  
1129 Montpellier SupAgro, <http://www.agro-montpellier.fr/sfds/CD/textes/pages1.pdf>

- 1130 Pecuchet, L., Reygondeau, G., Cheung, W. W. L., Licandro, P., van Denderen, P. D., Payne,  
1131 M. R., & Lindegren, M. (2018). Spatial distribution of life-history traits and their response to  
1132 environmental gradients across multiple marine taxa. *Ecosphere*, 9(10), e02460.  
1133 doi:<https://doi.org/10.1002/ecs2.2460>
- 1134 Phillips, S. J., Dudík, M., Elith, J., Graham, C. H., Lehmann, A., Leathwick, J., & Ferrier, S.  
1135 (2009). Sample selection bias and presence-only distribution models: implications for background and  
1136 pseudo-absence data. *Ecological Applications*, 19(1), 181–197.
- 1137 Pidwirny, M. (2006). Surface and subsurface ocean currents: Ocean current map.  
1138 fundamentals of physical geography, 2nd edition. Retrieved 2021-08.20, from  
1139 [http://www.physicalgeography.net/fundamentals/8q\\_1.html](http://www.physicalgeography.net/fundamentals/8q_1.html)
- 1140 Pinkerton, M. H., Smith, A. N. H., Raymond, B., Hosie, G. W., Sharp, B., Leathwick, J. R., &  
1141 Bradford-Grieve, J. M. (2010). Spatial and seasonal distribution of adult *Oithona similis* in the  
1142 Southern Ocean: Predictions using boosted regression trees. *Deep Sea Research Part I:  
1143 Oceanographic Research Papers*, 57(4), 469–485. doi:<https://doi.org/10.1016/j.dsr.2009.12.010>
- 1144 Pomerleau, C., Sastri, A. R., & Beisner, B. E. (2015). Evaluation of functional trait diversity  
1145 for marine zooplankton communities in the northeast subarctic pacific ocean. *Journal of Plankton  
1146 Research*, 37(4), 712–726. doi:10.1093/plankt/fbv045
- 1147 Prowe, A. E. F., Visser, A. W., Andersen, K. H., Chiba, S., & Kiørboe, T. (2019).  
1148 Biogeography of zooplankton feeding strategy. *Limnology & Oceanography*, 64(2), 661–678. doi:  
1149 10.1002/lno.11067
- 1150 Qiu, B., & Chen, S. (2004). Seasonal modulations in the eddy field of the south pacific ocean. *Journal  
1151 of Physical Oceanography*, 34(7), 1515–1527.
- 1152 Reygondeau, G., Guieu, C., Benedetti, F., Irisson, J.-O., Ayata, S.-D., Gasparini, S., &  
1153 Koubbi, P. (2017). Biogeochemical regions of the Mediterranean Sea: An objective multidimensional  
1154 and multivariate environmental approach. *Progress in Oceanography*, 151, 138–148.  
1155 doi:<https://doi.org/10.1016/j.pocean.2016.11.001>
- 1156 Richter, D. J., Watteaux, R., Vannier, T., Leconte, J., Frémont, P., Reygondeau, G., . . . Da  
1157 Silva, O. (2020). Genomic evidence for global ocean plankton biogeography shaped by large-scale  
1158 current systems. *BioRxiv*, 867739.
- 1159 Ricotta, C. (2005). A note on functional diversity measures. *Basic and Applied Ecology*, 6(5),  
1160 479–486.
- 1161 Sailley, S., Vogt, M., Doney, S., Aita, M., Bopp, L., Buitenhuis, E., ... Yamanaka, Y. (2013).  
1162 Comparing food web structures and dynamics across a suite of global marine ecosystem models.  
1163 *Ecological Modelling*, 261, 43–57.
- 1164 Segers, F. H. I. D., & Taborsky, B. (2011). Egg size and food abundance interactively affect  
1165 juvenile growth and behaviour. *Functional Ecology*, 25(1), 166–176.  
1166 doi:<https://doi.org/10.1111/j.1365-2435.2010.01790.x>

- 1167 Serra-Pompei, C., Soudijn, F., Visser, A. W., Kiørboe, T., & Andersen, K. H. (2020). A  
1168 general size- and trait-based model of plankton communities. *Progress in Oceanography*, 189,  
1169 102473. doi:<https://doi.org/10.1016/j.pocean.2020.102473>
- 1170 Shipley, B. R., Bach, R., Do, Y., Strathearn, H., McGuire, J. L., & Dilkina, B. (2021).  
1171 megaSDM: integrating dispersal and time-step analyses into species distribution models. *Ecography*,  
1172 44, 1-12. doi:<https://doi.org/10.1111/ecog.05450>
- 1173 Sommeria-Klein, G., Watteaux, R., Ibarbalz Federico, M., Pierella Karlusich Juan, J.,  
1174 Iudicone, D., Bowler, C., & Morlon, H. (2021). Global drivers of eukaryotic plankton biogeography in  
1175 the sunlit ocean. *Science*, 374(6567), 594-599. doi:10.1126/science.abb3717
- 1176 Stamieszkin, K., Pershing, A. J., Record, N. R., Pilskaln, C. H., Dam, H. G., & Feinberg, L. R.  
1177 (2015). Size as the master trait in modeled copepod fecal pellet carbon flux. *Limnology &*  
1178 *Oceanography*, 60(6), 2090–2107. doi: 10.1002/lno.10156
- 1179 Steinberg, D. K., & Landry, M. R. (2017). Zooplankton and the ocean carbon cycle. *Annual*  
1180 *Review of Marine Science*, 9, 413–444. doi: 10.1146/annurev-marine-010814-015924
- 1181 Stocker, T. (2014). Climate change 2013: the physical science basis: Working group I  
1182 contribution to the fifth assessment report of the intergovernmental panel on climate change.  
1183 Cambridge University Press.
- 1184 Thuiller, W., Georges, D., Engler, R., Georges, M. D., & Breiner F. (2020). biomod2:  
1185 Ensemble Platform for Species Distribution Modeling. R package version 3.4.6. [https://CRAN.R-](https://CRAN.R-project.org/package=biomod2)  
1186 [project.org/package=biomod2](https://CRAN.R-project.org/package=biomod2)
- 1187 Tittensor, D. P., Mora, C., Jetz, W., Lotze, H. K., Ricard, D., Berghe, E. V., & Worm, B.  
1188 (2010). Global patterns and predictors of marine biodiversity across taxa. *Nature*, 466(7310), 1098-  
1189 1101. doi:10.1038/nature09329
- 1190 Turner, J. T. (2004). The importance of small planktonic copepods and their roles in pelagic  
1191 marine food webs. *Zoological Studies*, 43(2), 255–266.
- 1192 Turner, J. T. (2015). Zooplankton fecal pellets, marine snow, phytodetritus and the ocean's  
1193 biological pump. *Progress in Oceanography*, 130, 205–248.  
1194 <http://dx.doi.org/10.1016/j.pocean.2014.08.005>
- 1195 van Someren Gréve, H., Almeda, R., & Kiørboe, T. (2017). Motile behavior and predation risk  
1196 in planktonic copepods. *Limnology & Oceanography*, 62(5), 1810– 1824. doi: 10.1002/lno.10535
- 1197 Veloz, S. D. (2009). Spatially autocorrelated sampling falsely inflates measures of accuracy  
1198 for presence-only niche models. *Journal of Biogeography*, 36(12), 2290–2299.
- 1199 Violle, C., Navas, M.-L., Vile, D., Kazakou, E., Fortunel, C., Hummel, I., & Garnier, E.  
1200 (2007). Let the concept of trait be functional! *Oikos*, 116(5), 882–892. doi: 10.1111/j.2007.0030-  
1201 1299.15559.x
- 1202 Visser, A. W., Grønning, J., & Jónasdóttir, S. H. (2017). *Calanus hyperboreus* and the lipid  
1203 pump. *Limnology & Oceanography*, 62(3), 1155-1165. doi:10.1002/lno.10492



1204 Woodd-Walker, R. S., Ward, P., & Clarke, A. (2002). Large-scale patterns in diversity and  
1205 community structure of surface water copepods from the Atlantic ocean. *Marine Ecology Progress*  
1206 *Series*, 236, 189–203.

1207

1208 *Biosketch*

1209 **Fabio Benedetti** is a postdoctoral researcher and **Meike Vogt** a senior research scientist in  
1210 the Environmental Physics (UP) group of ETH Zürich. Both share broad interests in plankton  
1211 biogeography and functional diversity and their links with biodiversity, ecosystem function  
1212 and biogeochemical cycles in the global ocean. F.B. is a macroecologist specialized in trait-  
1213 based approaches and plankton diversity modelling. M.V. is a marine ecosystem modeler  
1214 specialized plankton functional types. **Jonas Wydler** has successfully completed his MSc  
1215 degree in Environmental System Sciences at ETH Zürich, under the supervision of F.B. and  
1216 M.V., which is the subject of this work.

1217 F.B. and M.V. co-designed the study and F.B. collated the data used in the analyses and  
1218 provided expertise with regard to every methodology used. J.W. conducted the numerical  
1219 analyses and wrote the first version of the manuscript under the supervision of F.B. and M.V.  
1220 F.B. wrote the final version of the manuscript with input from both M.V. and J.W.

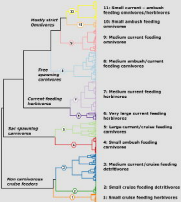

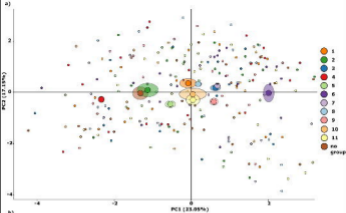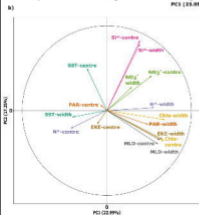

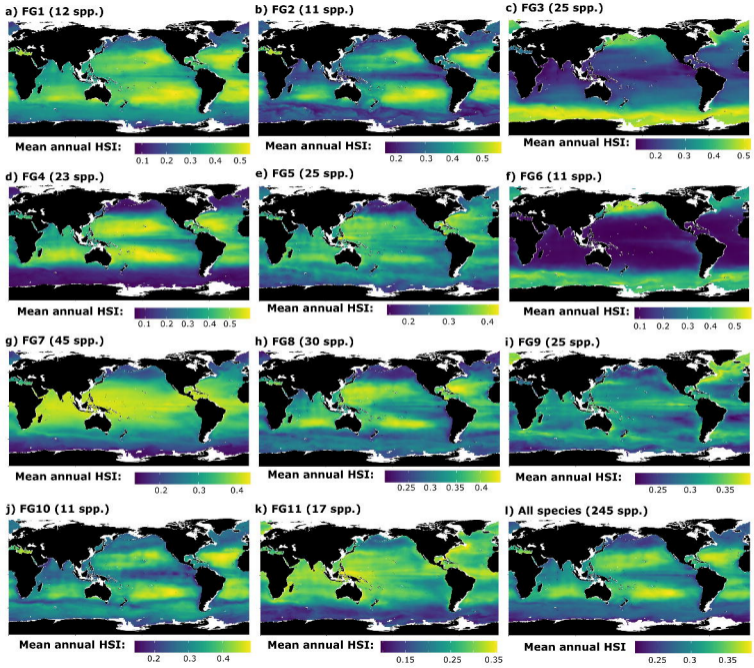

a)

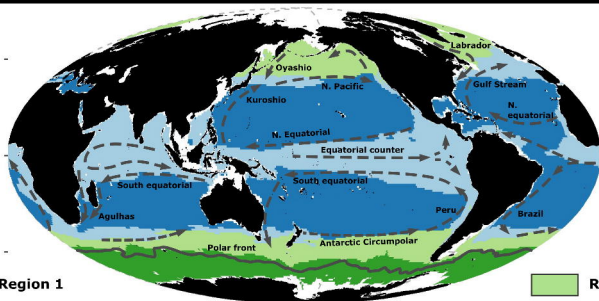

Region 1

Region 2

Region 3

Region 4

b) Median body size [mm]

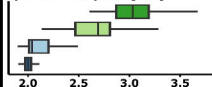

c) Proportion of myelinated species

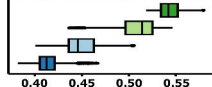

d) Proportion of sac spawning species

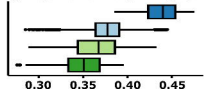

e) Proportion of carnivorous species

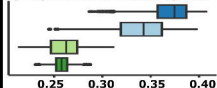

f) Proportion of herbivorous species

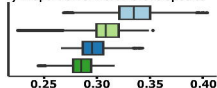

g) Proportion of detritivorous species

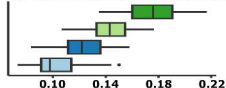

h) Proportion of omnivorous species

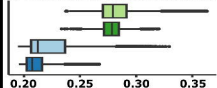

i) Proportion of ambush-feeding species

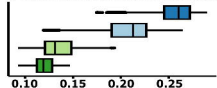

j) Proportion of current-feeding species

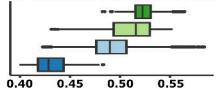

k) Proportion of cruise-feeding species

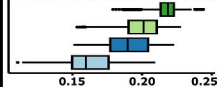

l) Proportion of current-ambush-feeding species

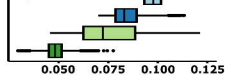

m) Proportion of current-cruise-feeding species

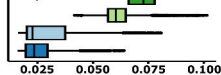

| This study | Main clade                            | Group definition                                                     | Pomerleau et al. (2015) - North Pacific Ocean                   | Benedetti et al. (2016) - Mediterranean Sea                              | Benedetti et al. (2018) - Mediterranean Sea                                    | Becker et al. (2021) - South Atlantic Ocean                                                      |
|------------|---------------------------------------|----------------------------------------------------------------------|-----------------------------------------------------------------|--------------------------------------------------------------------------|--------------------------------------------------------------------------------|--------------------------------------------------------------------------------------------------|
| FG1        | Clausocalanus                         | Small myelinated cruise-feeding omnivores-herbivores                 | Small current- and cruise-feeding omnivore-herbivores (Group 6) | Small cruise-feeding omnivores-herbivores (subset of Group 6)            | Small cruise-feeding omnivores-herbivores (Group 7)                            | Small and large myelinated cruise- and current-feeding omnivores-herbivores (subset of Group B)  |
| FG2        | Oncacidae                             | Small non myelinated cruise-feeding detritivores                     | No equivalent                                                   | Small cruise-feeding omnivores-detritivores (subset of Group 6)          | Small sac-spawning detritivores (subset of Group 5)                            | Small amyelinated ambush- or cruise-feeding carnivores or detritivores (small subset of Group D) |
| FG3        | Spinocalanus, Scaphocalanus, Metridia | Medium-sized myelinated mixed-feeding or cruise-feeding detritivores | No equivalent                                                   | Small cruise-feeding omnivores-detritivores (subset of Group 6)          | Small sac-spawning detritivores (small subset of Group 5)                      | No equivalent                                                                                    |
| FG4        | Corycaecidae                          | Small amyelinated ambush-feeding carnivores                          | No equivalent                                                   | Small ambush-feeding carnivores (Group 2)                                | Small ambush-feeding carnivores (Group 2)                                      | Small amyelinated ambush- or cruise-feeding carnivores or detritivores (small subset of Group D) |
| FG5        | Sapphirinidae, Euchaetidae            | Large current- or cruise-feeding carnivores                          | No equivalent                                                   | Large cruise-feeding carnivores (Group 1)                                | Large cruise- or current-feeding feeding carnivores (Group 1)                  | Small and large myelinated cruise- and current-feeding omnivores-herbivores (subset of Group B)  |
| FG6        | Calanus, Eucalanus                    | Very large myelinated current-feeding omnivores-herbivores           | No equivalent                                                   | No equivalent                                                            | No equivalent                                                                  | No equivalent                                                                                    |
| FG7        | Calanus, Paracalanus, Calocalanus     | Medium-sized myelinated current-feeding omnivores-herbivores         | Small and large current-feeding omnivores-herbivores (Group 5c) | Small and large current-feeding omnivores-herbivores (Group 4)           | Small and large current-feeding omnivores-herbivores (Groups 3 and 4)          | Large myelinated current-feeding omnivores-herbivores (subset of Group C)                        |
| FG8        | Cardacia, Haloptilus, Heterorhabdus   | Medium-sized amyelinated ambush- or current-feeding carnivores       | No equivalent                                                   | Large cruise-feeding carnivores (Group 1)                                | Large cruise- or current-feeding feeding carnivores (Group 1)                  | No equivalent                                                                                    |
| FG9        | Pleuromamma, Gaetanus, Labidocera     | Medium-sized amyelinated current-feeding omnivores                   | No equivalent                                                   | Small and large current-feeding omnivores-herbivores (subset of Group 4) | Small and large current-feeding omnivores-herbivores (small subset of Group 4) | No equivalent                                                                                    |
| FG10       | Oithonidae                            | Small amyelinated ambush-feeding omnivores                           | No equivalent                                                   | Small ambush-feeding omnivores (Group 5)                                 | Small ambush-feeding omnivores (Group 6)                                       | Small amyelinated mixed- or ambush-feeding omnivores (Group A)                                   |
| FG11       | Acartia, Centropages                  | Small amyelinated mixed-feeding omnivores                            | Small ambush-feeding omnivores (subset of Group 4)              | Small mixed-feeding omnivores (Group 3)                                  | Small mixed-feeding omnivores (small subset of Group 4)                        | Small amyelinated mixed- or ambush-feeding omnivores (Group A)                                   |
